# Supplementary material for: A Meaningful Strategy for Glioma Diagnosis via Independent Determination of hsa_circ_0004214
Source: MDPI journal article supplement (doi:10.3390/brainsci13020193), 2023-01-23
Supplement: s1 [file s1]

```

^DATABASE = GeoMiamme
!Database_name = Gene Expression Omnibus (GEO)
!Database_institute = NCBI NLM NIH
!Database_web_link = http://www.ncbi.nlm.nih.gov/geo
!Database_email = geo@ncbi.nlm.nih.gov
^SERIES = GSE13030
!Series_title = Human primary and secondary glioblastoma vs. non-neoplastic adult brain tissue
!Series_geo_accession = GSE13030
!Series_status = Public on Dec 19 2009
!Series_submission_date = Oct 02 2008
!Series_last_update_date = Mar 20 2012
!Series_summary = MicroRNAs (miRNAs) are small (21-25 nucleotide in length) non-coding RNA molecules
that negatively regulate protein expression. They are linked to cancer development and maintenance.
In this work, studying gene expression profiles of 340 mammalian miRNAs with DNA microarrays, we
selected 10 miRNAs gene features able to distinguish primary from secondary glioblastoma type;
furthermore we verified that miR-21 and miR-155 up-regulation seems to characterize the
glioblastoma tumour state since it was found up-regulated in all samples analyzed compared to adult
brain noneoplastic tissue. Since miR-21 function in glioblastoma cells was addressed previously
we concentrated our efforts on miR-155 function. We found that miR-155 levels were markedly elevated
both in primary and secondary glioblastomas tumours, in glioblastoma cell cultures and in 4
glioblastoma cell lines (U87, A172, LN229, and LN308) compared with adult brain tissue,
CHP212-neuroblastoma cell lines and DAOY-1-medulloblastoma cell line. Since one of the miR-155
target was gamma-aminobutyric acid (GABA) A receptor (GABRA1) we verified if there was a relation
between miR-155 up-regulation and GABRA1 expression. We demonstrated that, in cultured
glioblastoma cells, knockdown of miR-155, which lower miR-155 expression to normal level, restore
the normal expression of the gamma-aminobutyric acid (GABA) A receptor (GABRA1), making glioblastoma
cells responsive to GABA cell cycle inhibiting signals. Our data suggest that aberrantly
over-expressed miR-155 contribute to the malignant phenotype of the glioblastoma cells, promoting
their unlimited growth.
!Series_summary =
!Series_summary =
!Series_summary = Keywords: miRNA expression profile
!Series_overall_design = We studied the expression profiles of 340 miRNAs in 97 glioblastoma
tissues, of which 66 were primary glioblastomas and 27 were secondary glioblastomas. We have 66
replicates of primary glioblastoma and 27 replicates of secondary glioblastoma, each hybridized
with the respective adult non-neoplastic brain tissue as a control.
!Series_type = Non-coding RNA profiling by array
!Series_contributor = Oscar,F,D'Urso
!Series_contributor = Pietro,I,D'Urso
!Series_contributor = Pasqualino,,Ciappetta

```

For details, please download from the website.

Volcano map, using 10 samples.

|          |              |             |
|----------|--------------|-------------|
| miR-124a | -1.614425    | 0.254242189 |
| miR-125b | 1.44886      | 0.069575937 |
| miR-7    | -1.208666667 | 0.499517854 |
| let-7g   | 0.20214      | 0.491262071 |
| miR-16   | 0.24328      | 0.266913966 |

|            |              |             |
|------------|--------------|-------------|
| miR-29b    | -1.746075    | 0.276324414 |
| miR-99a    | -2.34032     | 0.096939903 |
| miR-92     | -0.12644     | 0.493909147 |
| miR-324-5p | -0.66408     | 0.020291275 |
| miR-132    | -0.3201      | 0.736566641 |
| miR-146a   | -0.24964     | 0.6350523   |
| let-7c     | 0.58332      | 0.25215134  |
| let-7b     | -0.20726     | 0.438662031 |
| miR-9      | -0.59716     | 0.573666489 |
| let-7a     | 0.03564      | 0.924602349 |
| miR-136    | 0.3624       | 0.427175208 |
| miR-130a   | -0.12748     | 0.805705252 |
| miR-26b    | -0.25368     | 0.423021288 |
| miR-28     | 0.61045      | 0.389017599 |
| miR-142-3p | -2.01936     | 0.12397008  |
| let-7e     | -3.40448     | 0.021206114 |
| miR-137    | -1.5719      | 0.358514971 |
| miR-320    | 0.06382      | 0.248702482 |
| miR-101b   | 1.22775      | 0.013034311 |
| let-7d     | -2.43392     | 0.15708912  |
| let-7f     | 0.1255       | 0.502292722 |
| miR-100    | 0.56728      | 0.388200985 |
| miR-103    | -0.05942     | 0.7888796   |
| miR-106a   | 0.13274      | 0.386532477 |
| miR-107    | -0.2516      | 0.344562844 |
| miR-10a    | -1.56282     | 0.191154485 |
| miR-10b    | -0.53578     | 0.31585443  |
| miR-122a   | 0.32106      | 0.606609016 |
| miR-126    | 0.13672      | 0.596159454 |
| miR-128a   | -4.90774     | 1.75997E-06 |
| miR-128b   | -4.13582     | 0.022796077 |
| miR-130b   | -0.009866667 | 0.984239198 |
| miR-133a   | 0.03938      | 0.924186412 |
| miR-134    | -0.155066667 | 0.833229172 |
| miR-135a   | -0.4487      | 0.443686669 |
| miR-140    | 0.089        | 0.561998266 |
| miR-141    | -0.31085     | 0.621603471 |
| miR-142-5p | -0.25738     | 0.870611603 |
| miR-143    | -3.57114     | 0.004574374 |
| miR-144    | -0.1152      | 0.341813371 |
| miR-145    | -1.32044     | 0.126338501 |
| miR-148a   | 0.14078      | 0.896925434 |
| miR-148b   | 0.351675     | 0.422325706 |
| miR-149    | -1.26934     | 0.027775557 |
| miR-150    | -2.49825     | 0.061747852 |
| miR-152    | -1.4493      | 0.403403277 |
| miR-153    | 0.332875     | 0.535555632 |
| miR-154    | 0.50045      | 0.503667867 |
| miR-155    | -0.33212     | 0.432284514 |

|           |             |             |
|-----------|-------------|-------------|
| miR-15a   | 0.06104     | 0.466141208 |
| miR-15b   | -0.29824    | 0.488086813 |
| miR-17-5p | -0.4712     | 0.032882093 |
| miR-18a   | -0.34356    | 0.486994979 |
| miR-181a  | -5.06348    | 6.56518E-07 |
| miR-181b  | -3.48926    | 0.076949166 |
| miR-181c  | -5.55144    | 1.01945E-05 |
| miR-182   | -3.293175   | 0.060467739 |
| miR-183   | -4.3128     | 0.020544943 |
| miR-187   | -1.398825   | 0.355182837 |
| miR-192   | -0.54482    | 0.237415456 |
| miR-196a  | 0.7131      | 0.012115957 |
| miR-199a  | -0.80762    | 0.569201179 |
| miR-199b  | -1.03288    | 0.458438704 |
| miR-19a   | 0.5752      | 3.51198E-07 |
| miR-19b   | 0.49496     | 0.050484557 |
| miR-20a   | -0.3126     | 0.073150593 |
| miR-203   | -1.01496    | 0.474787926 |
| miR-204   | -1.28335    | 0.310874243 |
| miR-205   | 0.116433333 | 0.90261553  |
| miR-21    | 6.9285      | 1.8422E-08  |
| miR-210   | 0           | 0           |
| miR-211   | 0.7645      | 0.077695337 |
| miR-212   | -2.20714    | 0.218913573 |
| miR-213   | 0.13114     | 0.935086089 |
| miR-214   | -1.3726     | 0.43123988  |
| miR-215   | -1.8924     | 0.192887115 |
| miR-216   | -2.39896    | 0.160038618 |
| miR-217   | -1.391325   | 0.380093955 |
| miR-218   | -5.81476    | 2.79466E-05 |
| miR-219   | -1.28826    | 0.320113282 |
| miR-22    | 0.01886     | 0.990389644 |
| miR-220   | 0.662133333 | 0.286103354 |
| miR-221   | 3.482       | 1.87351E-07 |
| miR-222   | -1.51514    | 0.238200775 |
| miR-223   | 0.13168     | 0.756815901 |
| miR-23a   | -1.6602     | 0.249165702 |
| miR-23b   | -0.0022     | 0.990445729 |
| miR-24    | -3.35425    | 0.052199163 |
| miR-26a   | 0.13156     | 0.527102043 |
| miR-27b   | -0.00256    | 0.994031917 |
| miR-29a   | -1.02348    | 0.144277533 |
| miR-30b   | -0.13452    | 0.753340361 |
| miR-30c   | -2.05106    | 0.260034374 |
| miR-30d   | -0.04342    | 0.897750398 |
| miR-34a   | -1.273325   | 0.394348828 |
| miR-9     | -0.84762    | 0.55046002  |
| miR-96    | -1.274525   | 0.391802004 |
| miR-98    | 0.5362      | 0.418765939 |

|            |              |             |
|------------|--------------|-------------|
| miR-29c    | -0.636675    | 0.383063068 |
| miR-30a-3p | 0.222966667  | 0.518767351 |
| miR-217    | -3.2008      | 0.014674326 |
| miR-199b   | -3.58784     | 0.063305764 |
| miR-211    | -1.5427      | 0.364383255 |
| miR-10b    | -2.66604     | 0.077069169 |
| miR-184    | 0.02486      | 0.951477106 |
| miR-186    | -1.610333333 | 0.342199407 |
| miR-188    | -1.57552     | 0.213317764 |
| miR-190    | -1.2589      | 0.394536029 |
| miR-193a   | -1.248975    | 0.422566519 |
| miR-194    | -1.90485     | 0.236993085 |
| miR-195    | 0.24212      | 0.01203475  |
| miR-197    | -1.96292     | 0.177303312 |
| miR-198    | -0.940533333 | 0.369781157 |
| miR-199a   | 0.9817       | 0.013047916 |
| miR-200a   | -1.0833      | 0.474632821 |
| miR-200b   | -0.358725    | 0.83330356  |
| miR-201    | -3.640825    | 0.030049503 |
| miR-202    | -1.298466667 | 0.460631913 |
| miR-206    | -0.16212     | 0.74181957  |
| miR-207    | -2.62498     | 0.031546329 |
| miR-208    | -4.200533333 | 0.027769699 |
| miR-101    | -0.32578     | 0.652285805 |
| miR-105    | -1.00694     | 0.472444187 |
| miR-106b   | -0.28994     | 0.240224916 |
| miR-126    | 0.1266       | 0.633721833 |
| miR-127    | -1.88218     | 0.157781454 |
| miR-147    | -0.75292     | 0.354438705 |
| miR-155    | 2.41764      | 9.79424E-08 |
| miR-17-3p  | -2.67695     | 0.172320295 |
| miR-182    | -1.43965     | 0.318542181 |
| miR-189    | 0.6122       | 0.275751854 |
| miR-224    | -1.06275     | 0.027825768 |
| miR-25     | -1.4955      | 0.242557922 |
| miR-27a    | -0.4821      | 0.07392113  |
| miR-296    | -1.420125    | 0.323187778 |
| miR-299-5p | -1.81074     | 0.341344465 |
| miR-301    | 0.49324      | 0.352360821 |
| miR-302a   | -0.5875      | 0.324962043 |
| miR-30a-5p | 0.88292      | 0.132763365 |
| miR-30e-5p | 0.49846      | 0.673276449 |
| miR-31     | -2.41915     | 0.238238403 |
| miR-32     | -0.01122     | 0.968956925 |
| miR-34b    | -1.43428     | 0.474214177 |
| miR-34c    | 0.2503       | 0.262658002 |
| miR-93     | -0.29422     | 0.076437712 |
| miR-95     | -1.79144     | 0.229868319 |
| let-7d     | -0.16232     | 0.830225127 |

|            |              |             |
|------------|--------------|-------------|
| miR-106a   | 0.09532      | 0.500609344 |
| miR-135b   | -2.7532      | 0.144295047 |
| miR-151    | -2.1285      | 0.236705699 |
| miR-17-3p  | -2.157966667 | 0.191649819 |
| miR-224    | -3.06085     | 0.100123604 |
| miR-290    | -1.1232      | 0.488207625 |
| miR-291-3p | 0.336375     | 0.062453457 |
| miR-291-5p | -1.324525    | 0.381234657 |
| miR-292-3p | -1.031833333 | 0.577092722 |
| miR-292-5p | 0.40854      | 0.605470197 |
| miR-293    | -1.56884     | 0.224661058 |
| miR-294    | 0.400825     | 0.381374776 |
| miR-295    | -1.64125     | 0.253115454 |
| miR-297    | -1.7345      | 0.191816784 |
| miR-298    | -1.04606     | 0.459128055 |
| miR-300    | -0.6937      | 0.496782507 |
| miR-323    | -4.1466      | 0.031835368 |
| miR-324-3p | -1.749033333 | 0.293991968 |
| miR-325    | -0.37484     | 0.469287523 |
| miR-326    | -4.145075    | 0.006163099 |
| miR-328    | -4.346433333 | 0.018684338 |
| miR-329    | -0.0366      | 0.975115313 |
| miR-331    | 0.1964       | 0.78321365  |
| miR-337    | 0.66622      | 0.34528704  |
| miR-338    | -3.20098     | 0.126876625 |
| miR-339    | -3.188375    | 0.016529439 |
| miR-340    | -2.37506     | 0.172049006 |
| miR-341    | 0.878875     | 0.019266654 |
| miR-342    | -0.51882     | 0.035461996 |
| miR-344    | -2.91825     | 0.112578033 |
| miR-345    | 0.9668       | 0.065896806 |
| miR-346    | -0.31718     | 0.71748811  |
| miR-34b    | 0.2993       | 0.272106304 |
| miR-351    | 0.07825      | 0.748226767 |
| miR-7b     | -4.084066667 | 0.037066951 |
| miR-20     | 0.4491       | 0.426737494 |
| miR-327    | 1.243833333  | 1.98279E-05 |
| miR-333    | -0.45846     | 0.685708537 |
| miR-335    | 0.10562      | 0.782769776 |
| miR-336    | 0.77906      | 0.153693915 |
| miR-344    | 0.41385      | 0.76183679  |
| miR-346    | 0.38198      | 0.35034975  |
| miR-347    | -0.6111      | 0.697010578 |
| miR-349    | 1.00838      | 0.073310371 |
| miR-352    | -0.04532     | 0.946161271 |
| miR-7      | -2.7693      | 0.062197343 |
| miR-133b   | 0.42864      | 0.55541826  |
| miR-151    | 0.518625     | 0.130385509 |
| miR-196b   | -0.34474     | 0.703083658 |

|            |              |             |
|------------|--------------|-------------|
| miR-302b   | -0.15074     | 0.736702351 |
| miR-302b   | 0.05054      | 0.974479581 |
| miR-370    | -0.8753      | 0.542559977 |
| miR-371    | -3.92705     | 0.012043576 |
| miR-372    | 0.3357       | 0.489256935 |
| miR-373    | -1.66952     | 0.196179114 |
| miR-373    | 1.16255      | 0.00298497  |
| miR-374    | 0.48148      | 0.506080112 |
| miR-215    | 0.81174      | 0.153148278 |
| miR-409-3p | -3.838466667 | 0.00336567  |
| miR-410    | -1.96914     | 0.2863083   |
| miR-376b   | -0.224       | 1.06223E-05 |
| miR-376a   | 0.498133333  | 0.350171789 |
| miR-411    | 1.02194      | 0.027411579 |
| miR-380-3p | -0.5463      | 0.73972352  |
| miR-412    | -1.842566667 | 0.272217943 |
| miR-521    | 0.133675     | 0.886403948 |
|            | 0.36908      | 0.129497574 |
|            | -0.16598     | 0.375684124 |
|            | -0.1613      | 0.075832545 |
|            | 0.18418      | 0.300775375 |
|            | 0.04284      | 0.784495495 |
|            | 0.29306      | 0.249272832 |
|            | 0.1504       | 0.550077754 |
|            | 0.24374      | 0.282165676 |
|            | 0.05326      | 0.859568424 |
|            | 0.26238      | 0.007909036 |
|            | 0.31604      | 0.263101828 |
|            | -0.06402     | 0.75217375  |
|            | -0.2311      | 0.536106066 |
|            | -0.1116      | 0.711738714 |
|            | 0.11092      | 0.515925525 |
|            | 0.58882      | 0.041793396 |
|            | -0.24766     | 0.316945832 |
|            | -0.07532     | 0.780192495 |
|            | 0.00394      | 0.982858843 |
|            | 0.28548      | 0.121137021 |
| miR-330    | 0.6975       | 0.119447024 |
| miR-322    | -0.0452      | 0.914730851 |
| miR-424    | -1.171675    | 0.492033153 |
| miR-129-3p | 0.7691       | 0.001199869 |
| miR-361    | -1.9106      | 0.15934215  |
| miR-375    | -1.2097      | 0.496768144 |
| miR-377    | -2.070733333 | 0.188206205 |
| miR-378    | 1.49564      | 0.01019641  |
| miR-379    | -3.848825    | 0.016686089 |
| miR-380-5p | -0.42716     | 0.689155301 |
| miR-381    | -0.03544     | 0.947817125 |
| miR-382    | -5.10646     | 0.005079175 |

|                                          |              |             |
|------------------------------------------|--------------|-------------|
| miR-383                                  | -3.53866     | 0.070384496 |
| miR-384                                  | -4.3031      | 0.021106578 |
| miR-425                                  | -0.00185     | 0.996213956 |
| miR-452                                  | -1.716525    | 0.249094643 |
| miR-30e-3p                               | -1.283175    | 0.386329284 |
| miR-362                                  | -0.2636      | 0           |
| miR-423                                  | -1.15722     | 0.399415103 |
| miR-18b                                  | -5.90494     | 1.29564E-07 |
| miR-20b                                  | -0.05684     | 0.856792291 |
| miR-363                                  | 0.37854      | 0.40104792  |
| hsa-mir-520c, hsa-mir-520b, hsa-mir-520f | -0.96825     | 0.558658968 |
| miR-200a                                 | 0.375066667  | 0.239242108 |
| miR-302a                                 | 0.26274      | 0.642713    |
| miR-299-3p                               | 0.93464      | 0.141851409 |
| miR-191                                  | -0.8299      | 0.071096874 |
| miR-154                                  | -2.36032     | 0.079399351 |
| miR-522                                  | 0.518766667  | 0.391021793 |
| miR-369-5p                               | -1.639933333 | 0.233849451 |
| miR-297                                  | 1.3736       | 0.006895184 |
| miR-421                                  | -1.535375    | 0.038857209 |
| miR-463                                  | 0.72988      | 0.000962497 |
| miR-464                                  | -2.6327      | 0.170560947 |
| miR-465                                  | 0.083775     | 0.872460688 |
| miR-466                                  | -0.32362     | 0.502362878 |
| miR-467                                  | -2.73498     | 0.120639266 |
| miR-468                                  | 0.29314      | 0.301491737 |
| miR-469                                  | -1.2382      | 0.377396532 |
| miR-470                                  | -1.7519      | 0.209626461 |
| miR-471                                  | -0.1674      | 0.604772906 |
| miR-434-5p                               | -0.09904     | 0.852787699 |
| miR-434-3p                               | 0.03812      | 0.955107603 |
| miR-433-5p                               | -0.544633333 | 0.313815861 |
| miR-129                                  | 0.052625     | 0.932327783 |
| let-7i                                   | 0.44066      | 0.55345516  |
| miR-200c                                 | -0.58144     | 0.565491605 |
| miR-350                                  | -1.58025     | 0.263560024 |
| miR-343                                  | 0.29738      | 0.674285432 |
| miR-185                                  | -4.805833333 | 0.003986106 |
| miR-138                                  | -1.010175    | 0.529571912 |
| miR-191                                  | -0.1423      | 0.578252556 |
| miR-139                                  | 1.6145       | 0.007507379 |
| miR-33                                   | 0.23855      | 0.666940734 |
| hsa-mir-342                              | -0.28978     | 0.728000053 |
| hsa-mir-19a                              | 0.81164      | 0.001997053 |
| miR-517a, miR-517b                       | -1.19788     | 0.406189574 |
| miR-516-5p                               | -2.920975    | 0.11950435  |
| miR-518b                                 | -1.84986     | 0.218730735 |
| miR-519d                                 | -3.176275    | 0.084225448 |
| miR-495                                  | -0.9655      | 0.399633127 |

|                |              |             |
|----------------|--------------|-------------|
| hsa-mir-28     | 0.0582       | 0.945640061 |
| hsa-mir-519a-2 | 0.0844       | 0.875125939 |
| hsa-mir-26b    | -5.08335     | 0.000246813 |
| miR-526c       | -0.94936     | 0.516497397 |
| miR-527        | -3.96414     | 0.032262712 |
| hsa-mir-29b-2  | -5.34972     | 0.001328987 |
| let-7g         | -0.35465     | 0.593384591 |
| miR-518a       | -0.372233333 | 0.583940833 |
| miR-523        | -1.89646     | 0.16631804  |
| miR-515-3p     | 0.7298       | 0.014902694 |
| hsa-mir-146b   | 1.3505       |             |
| hsa-mir-222    | -1.56052     | 0.276437325 |
| miR-451        | 0.16176      | 0.444284866 |
| hsa-mir-24     | -3.0539      | 0.090207603 |
| miR-503        | 0.3089       | 0.565398946 |
| hsa-mir-505    | -1.63048     | 0.402664255 |
| miR-518e       | 0.57356      | 0.177461964 |
| miR-432        | -6.6439      |             |
| hsa-mir-193    | -1.04785     | 0.472442438 |
| miR-519a       | -1.853625    | 0.180387748 |
| miR-515-5p     | -1.82368     | 0.337391685 |
| hsa-mir-516-1  | -1.943975    | 0.155723374 |
| miR-140        | -0.1936      | 0.5257002   |
| hr-mir-151     | -0.09422     | 0.52989588  |
| hsa-mir-18     | 0.41935      | 0.666251539 |
| hsa-mir-19b-1  | -3.67405     | 0.024450982 |
| hsa-mir-23a    | -2.661       | 0.164159796 |
| mir-527        | -0.484575    | 0.465794553 |
| hsa-mir-339    | 0.6523       | 0.006832283 |
| hsa-mir-423    | -0.07858     | 0.773889167 |
| hsa-mir-425    | -0.40536     | 0.601176143 |
| hsa-mir-92-1   | -1.862733333 | 0.252246966 |
| hsa-mir-30d    | -2.0677      | 0.11498807  |
| miR-99b        | 0.16876      | 0.293126544 |
| miR-433        | 0.916825     | 0.175973334 |
| miR-431        | -2.74785     | 0.154826435 |
| miR-365        | -0.91894     | 0.535583203 |
| miR-450        | -3.0131      | 0.017052082 |
| miR-449        | -1.1343      | 0.450439469 |
| miR-429        | 0.28976      | 0.707793562 |
| miR-448        | 0.014675     | 0.98565578  |



heat map, using 10 samples.

| ID            | 1       | 2       | 3       | 4       | 5       | 6       | 7       | 8       | 9       | 10       |          |
|---------------|---------|---------|---------|---------|---------|---------|---------|---------|---------|----------|----------|
| miR-18b       | -4.4707 | -6.6439 | -6.6439 | -6.5064 | -5.2598 | -6.6439 |         |         |         | -58.7242 |          |
| miR-181a      | -4.1078 | -4.3659 | -6.6439 | -4.7065 | -5.4933 | -4.4675 |         |         |         | -51.2997 |          |
| miR-128a      | -3.5907 | -6.6439 | -5.088  | -4.7293 | -4.4868 | -4.4422 | -4.1714 | -4      | -4.7959 | -3.6153  | -45.5635 |
| miR-181c      | -6.6439 | -3.2793 | -4.5462 | -6.6439 | -6.6439 | -3.1584 | -2.7274 | -3.3868 | -3.399  | -3.2109  | -43.6397 |
| miR-30c       | 0.2104  | 1.7225  | -6.6439 | -6.6439 | 1.0996  | -6.6439 | -4.2163 | -6.6439 | -6.6439 | -2.0291  | -36.4324 |
| hsa-mir-29b-2 | -6.6439 | -6.6439 | -6.6439 | -0.173  | -6.6439 | -6.6439 | 0.8875  | -6.6439 | 1.8875  | 1.9635   | -35.2979 |
| miR-469       | 1.1699  | -1.5023 | -0.881  | 1.6663  | -6.6439 | -6.6439 | -6.6439 | -6.6439 | -6.6439 | 0.1137   | -32.6529 |
| miR-328       | -6.6439 | -6.6439 |         | 0.2485  |         | -6.6439 | -6.6439 | -6.6439 |         | 0.4854   | -32.4856 |
| miR-527       | -6.6439 | -6.6439 | 1.848   | -1.737  | -6.6439 | -1.4779 | -6.6439 |         |         | -3.8489  | -31.7914 |
| miR-384       | -6.6439 |         |         | -6.6439 | 0.3785  | -0.1976 | -6.6439 | -6.6439 | -6.6439 | 1.3785   | -31.6601 |
| miR-326       | -2.041  | -6.6439 |         | -1.2515 | -6.6439 |         | -6.6439 | -6.6439 | -0.5353 | -0.3659  | -30.7693 |
| miR-519d      | -6.6439 |         | -1.0954 | -6.6439 | 1.6781  | -6.6439 | 0.648   | -6.6439 | -6.6439 | 1.4594   | -30.5294 |
| miR-382       | 1.0433  | -6.6439 | -6.6439 | -6.6439 | -6.6439 | -6.6439 |         | 1       | -0.7084 | 1.9844   | -29.9002 |
| miR-371       | -1.0985 |         | -1.3219 | -6.6439 | -6.6439 | 0.9313  |         | -1.2076 | -6.6439 | -6.6439  | -29.2723 |
| miR-181b      | 0.848   | -6.6439 | 1.6374  | -6.6439 | -6.6439 | -2.889  | -6.6439 | 2.121   | -3.9546 |          | -28.8128 |
| miR-132       | -3.2243 | -0.1472 | 1.8278  | 1.926   | -1.9828 | -6.6439 | -6.6439 | -6.6439 | 0.1257  | -6.6439  | -28.0504 |
| miR-199b      | 0.5331  | -6.6439 | -6.6439 | -6.6439 | 1.4594  |         | -0.4739 | -6.6439 | -0.462  | -1.6574  | -27.1764 |
| miR-379       | -6.6439 | -0.2345 | -1.873  | -6.6439 |         |         | 0.2203  | -6.6439 | 1.585   | -6.6439  | -26.8778 |
| hsa-mir-26b   | -6.6439 |         |         |         | -3.5228 | -6.6439 | -2.5479 | -6.6439 |         | -0.527   | -26.5294 |
| miR-383       | -6.6439 | -6.6439 | 0.538   | -6.6439 | 1.7004  | 0.3219  | -6.6439 |         |         | -1.8943  | -25.9096 |
| miR-208       |         | 0.6862  |         | -6.6439 | -6.6439 |         | -6.6439 | 1.8278  | -6.6439 | -1.1714  | -25.233  |
| miR-185       | -6.6439 |         |         | -6.6439 | -1.1297 | -6.6439 | -1.0145 |         | -3.0954 |          | -25.1713 |
| miR-218       | -2.4982 | -6.6439 | -6.6439 | -6.6439 | -6.6439 |         | 1.9449  | 0.2726  | 1.8156  | 0.6304   | -24.4103 |
| miR-467       | -1.4228 | -6.6439 | -1.6082 | -6.6439 | 2.6439  | -6.6439 | 0.6654  | -6.6439 | 1.0108  | 1.0136   | -24.2729 |
| miR-143       | -4.9885 | -6.6439 | -3.2793 | -2.458  | -0.486  | -6.6439 |         | 0.2497  | -0.2481 | 0.9419   | -23.5561 |
| miR-96        | 0.8074  | 1.1043  |         | -6.6439 | -0.3659 | 1.4854  | -1.9714 | -6.6439 | -6.6439 | -3.8079  | -22.6798 |
| miR-199a      | 1.433   | -6.6439 | 1.6088  | 0.1375  | -0.5735 | -6.6439 | 1.893   | -0.4521 | -6.6439 | -6.6439  | -22.5289 |
| miR-431       |         | 0.6627  | -6.6439 | 1.6337  | -6.6439 | 0.9686  | -0.9351 | -6.6439 | 2.0531  | -6.6439  | -22.1926 |
| miR-450       | -0.9241 | -4.5031 | -6.6439 | -2.4422 | -0.5522 | -0.7934 | 0.9046  | -0.6038 | -6.6439 | 0.2054   | -21.9966 |
| miR-151       | 1.7004  | 0.1375  | -6.6439 | 0.8074  | -6.6439 | -6.6439 | 2.0704  | 2.0531  | -6.6439 | -1.5187  | -21.3255 |
| miR-339       |         | -0.3566 | -3.9062 | -6.6439 | -1.8468 | -2.2379 | -6.6439 |         |         | 0.3219   | -21.3134 |
| miR-207       | -2.9546 | 0.3265  | -2.2447 | -1.6082 | -6.6439 | 0.2228  | -1.9658 | -2.4266 | -0.1094 | -3.673   | -21.0769 |
| miR-201       | -6.6439 | -6.6439 | -1.6804 |         | 0.4049  | -6.6439 | 0.6415  |         | 0.5341  | -0.8034  | -20.835  |
| hsa-mir-516-1 | -1.1016 |         | 0.5028  | -0.5332 | -6.6439 | -6.6439 | 0.7433  | -6.6439 |         | 0.3874   | -19.933  |
| miR-154       | -6.6439 | -0.5973 | 0.6323  | -4.088  | -1.1047 | 2.4463  | -6.6439 | -0.1633 | -2.5649 | -1.1811  | -19.9085 |
| miR-210       |         |         |         |         |         | -6.6439 | 0.1375  | -6.6439 |         | -6.6439  | -19.7942 |
| miR-340       | -6.6439 | 1.1043  | -6.6439 | 1.0356  | -0.7274 | 0.9804  | -6.6439 | -3.8868 | -0.6506 | 2.7225   | -19.3537 |
| miR-425       |         | -1.1552 | 1.1204  | -0.3511 | 0.3785  | 1.3505  | -6.6439 | -6.6439 | -1.458  | -5.5873  | -18.99   |
| miR-137       |         |         | -6.6439 | 0.184   | 1.7442  | 0.0426  | -6.6439 | -0.5778 | -0.3827 | -6.6439  | -18.9214 |
| miR-217       | -1.5564 |         | -6.6439 | -3.9062 | -0.6967 | 1.5361  |         | -6.6439 | -0.9159 |          | -18.8269 |
| miR-7b        |         | 1.0356  |         | -6.6439 | -6.6439 |         | 0.144   |         | -6.6439 |          | -18.7521 |
| miR-128b      | -2.458  | -6.6439 | 1.7106  | -6.6439 | -6.6439 | -0.8783 | 0.2179  | 0.926   | 1.211   | 0.4875   | -18.715  |
| miR-216       | 0.433   | -6.6439 | -6.6439 | 0.7225  | 0.1375  | 0.3219  | -6.6439 |         |         |          | -18.3168 |

|                    |         |         |         |         |         |         |         |         |         |         |          |
|--------------------|---------|---------|---------|---------|---------|---------|---------|---------|---------|---------|----------|
| miR-518a           | 0.848   |         |         | 0.4854  | -2.4501 |         | -6.6439 | -4.3219 | 0.7467  | -6.6439 | -17.9797 |
| miR-30a-3p         |         | -0.8339 |         | 0.7655  | 0.7373  |         | 1.511   | -6.6439 | -6.6439 | -6.6439 | -17.7518 |
| miR-211            | 0.6098  | 1.406   |         |         | -6.6439 | 0.6781  | -6.6439 |         | -6.6439 |         | -17.2378 |
| hsa-mir-30d        | -6.6439 | 0.1583  | -1.3548 | 0.585   | -3.0831 |         | -6.6439 | -2.0954 | -0.255  | 2.511   | -16.8218 |
| miR-202            | -6.6439 |         | 1.0704  |         | 1.6781  | -0.3474 | -6.6439 |         | -6.6439 | 0.7655  | -16.7651 |
| miR-517a, miR-517b | -6.6439 | -1.6394 | -1      | 1.2558  | 2.0381  | -6.6439 | 0.0704  | -4.0589 | 2.5969  | -2.3219 | -16.3468 |
| miR-298            | -1.1266 | 1.5023  | -0.5228 | 1.5607  | -6.6439 | -6.6439 | 2.3646  | -0.0786 | -0.0801 | -6.6439 | -16.3122 |
| let-7e             | -1.6758 | -6.6439 | -1.8678 | -0.191  | -6.6439 | -0.4719 | 2.7655  |         | -1.8468 | 0.4093  | -16.1663 |
| miR-24             | 0.107   |         | -6.6439 | -0.2362 | -6.6439 | 2.1538  |         | -6.6439 |         | 1.7442  | -16.1629 |
| miR-421            | -0.2379 | -1.7418 | -0.4344 | -3.7274 |         | -2.8997 | 2.5361  | -6.6439 | -2.2042 | -0.8034 | -16.1566 |
| miR-194            | -3.2793 | -6.6439 | 0.3219  |         | 1.9819  | -1.4074 | -1.5649 | -6.6439 | 0.0704  | 1.3219  | -15.8433 |
| miR-297            | -1.5105 | -1.949  | 1.3785  | 0.0524  | -6.6439 | -2.2584 | -0.1345 | -0.7013 | -3.1456 | -0.8443 | -15.7566 |
| miR-183            |         | 0.3494  | -6.6439 | -6.6439 |         | -6.6439 | 1.1454  |         | 1.406   | 1.6088  | -15.4221 |
| miR-99a            | -0.1714 | -6.6439 | -0.1234 | -0.0336 | -4.7293 | 1.8532  | 0.6397  | -0.6439 | 1.2491  | -6.6439 | -15.2474 |
| miR-448            | 0.7655  | -2.8262 | 0.1375  |         | 1.9819  | -1.0559 | -6.6439 |         | -0.8599 | -6.6439 | -15.1449 |
| miR-327            |         | 1.433   | 0.848   |         | 1.4505  | 1.585   | -0.415  | -6.6439 | -6.6439 | -6.6439 | -15.0302 |
| miR-34b            | -6.6439 | 1.8679  | 2.0356  | 2.2129  | -6.6439 |         | 1.1375  | -1.9658 | -6.6439 |         | -14.6436 |
| miR-31             | -6.6439 | 1.2327  |         | -6.6439 | 2.3785  | -0.4266 | -6.6439 | 0       | 2.2327  |         | -14.5144 |
| miR-338            | -6.6439 | -6.6439 | -6.6439 | 1.9819  | 1.9449  |         |         |         | 0.4854  | 1.1375  | -14.382  |
| miR-470            | -6.6439 |         | -0.488  | 0.7216  | -0.5973 | 1.0286  | -0.3978 | -4.5031 | -4.1153 | 0.6781  | -14.3171 |
| miR-222            | 0.585   | -6.6439 | -0.482  | 0.3573  | -1.3921 | -1.2653 | -1.5228 | 2.1043  | -1.4659 | -4.436  | -14.1614 |
| miR-293            | 0.4222  | -1.8009 | -6.6439 | 0.4542  | -0.2758 | 2.278   | -6.6439 | 0.848   | -1.873  | -0.8391 | -14.0742 |
| miR-141            | 0.6323  | 0.9635  | -2.5064 |         | -0.3328 | -6.6439 | 1.9449  | -6.6439 | -1.4344 |         | -14.0207 |
| miR-10a            | -1.1266 | 1.848   | -1.1234 | -5.8039 | -1.6082 | -6.6439 | -1.077  | 0.2016  | 1.7004  |         | -13.633  |
| miR-105            | 2.1538  | -0.2142 | 0.3045  | -6.6439 | -0.6349 | 2.0531  | -6.6439 | 1.6554  | -2.2243 | -3.3076 | -13.502  |
| miR-212            | 1.6521  | 1.2016  | -6.6439 | -0.6016 | -6.6439 | 1.1991  | 1.6781  | 0.7225  | 0.585   | -6.6439 | -13.4949 |
| miR-149            | -0.9743 | -1.7084 | -1.1714 | 0.4071  | -2.8997 | 0.8448  | -6.6439 |         | -0.5291 | -0.7588 | -13.4337 |
| miR-122a           | 1.8278  | 0.926   | 0.6425  | 0.3674  | -2.1584 | -6.6439 |         | -0.6735 | -6.6439 | -1      | -13.356  |
| miR-292-3p         | 1       | -6.6439 |         | 2.5484  |         | -6.6439 | -0.255  | -4.662  | 1.4594  |         | -13.197  |
| miR-380-3p         | 1.3057  | 0.9358  |         | -6.6439 | 2.2172  | -6.6439 | -3.7819 |         | -0.2226 | -0.3364 | -13.17   |
| miR-145            | -3.3076 | -3.4596 | 0.1177  | 0.6844  | -0.6371 | -6.6439 | -0.8365 | -0.4779 | -0.6148 | 2.278   | -12.8973 |
| miR-432            |         |         | -6.6439 | -6.6439 |         | 0.7689  | -0.5543 | 0.7022  |         | -0.4699 | -12.8409 |
| miR-516-5p         | -6.6439 | -6.6439 | 0.1979  | 1.406   |         | 2.0356  | 0.7832  | -6.6439 | 1.2928  | 1.5361  | -12.6801 |
| miR-150            | 0.0704  | -2.5649 | -6.6439 | -0.8546 |         | 0.1674  |         | -0.4719 | 1       | -3.3629 | -12.6604 |
| hsa-mir-24         | 0.5361  | -6.6439 |         |         |         |         | -1.2379 |         | 1.4594  | -6.6439 | -12.5302 |
| hsa-mir-19b-1      |         | -0.6349 | -6.6439 | -6.6439 | -0.7735 | 1.7874  | 0.7983  | 0.6323  | -0.4679 | -0.5228 | -12.4689 |
| miR-217            | -1.4901 |         | 2.4983  | 0.0704  | -6.6439 | 1.3127  | -0.3997 | -0.7298 | -6.6439 | -0.3827 | -12.4087 |
| miR-519a           | 0.0524  | 0.3516  | -1.1746 | -6.6439 |         | -2.7084 | 1.1043  | -0.5395 | -0.6171 | -2.1714 | -12.3466 |
| miR-204            | -5.4235 | -0.3076 |         | -1.2898 | 1.8875  | 0.6654  | 1.8679  | -6.6439 |         | -3.0469 | -12.2909 |
| miR-452            | -6.6439 | 1.8875  |         | -1.0923 | -1.0174 | 0.848   |         | 0.585   | -6.6439 |         | -12.077  |
| miR-135b           |         | -6.6439 |         |         | 1.1375  | -1.4501 | 1.5607  |         | -6.6439 |         | -12.0397 |
| hsa-mir-23a        |         |         | -6.6439 | 1.3219  |         |         |         | -6.6439 |         |         | -11.9659 |
| miR-322            | 0.5646  | -1.7418 | 0.7824  | -0.2042 | 0.373   | 1.6572  | -1.1877 | 1.2029  | -6.6439 | -6.6439 | -11.8414 |
| miR-526c           | -6.6439 | 1.7655  | 1.9069  | -0.3603 | -1.415  |         |         | -2.1392 | -2.0529 | -2.5649 | -11.5038 |
| miR-344            | 0.8074  |         | -6.6439 |         |         | -6.6439 | 1.6088  | -2.152  |         | 1.5607  | -11.4629 |
| miR-410            | 0.3219  | 1.8875  | -6.6439 | 1.2327  | -6.6439 | -0.1313 | 0.2016  | -0.1345 | 0.111   | -1.6038 | -11.4027 |
| miR-409-3p         | -2.035  | -6.6439 |         |         | -2.8365 | 2.278   | 2.3363  | 2.4463  | -6.6439 | -0.2226 | -11.3213 |

|             |         |         |         |         |         |         |         |         |         |         |          |
|-------------|---------|---------|---------|---------|---------|---------|---------|---------|---------|---------|----------|
| miR-365     | -0.5522 | -6.6439 | 1.263   | -1.2345 | 2.5729  | -0.2009 | 0.8742  | -0.1617 | -6.6439 | -0.48   | -11.207  |
| miR-361     | -6.6439 |         | -0.4941 | -0.706  | 0.2016  | -0.2126 | -6.1078 | 1.4787  | 1.6215  | -0.2396 | -11.1022 |
| miR-523     | -6.6439 | 0.5361  | -3.5228 | 0.2376  | -0.0893 | 1.585   |         | 0.585   | -2.3219 | -1.458  | -11.0922 |
| miR-224     | 1.7225  | -6.6439 | -6.6439 | -0.6781 |         | -1.5864 |         | 1.7866  |         | 0.959   | -11.0842 |
| miR-464     |         |         | -6.6439 |         | 1.3785  | 1.0356  |         |         |         | -6.6439 | -10.8737 |
| miR-34b     | -0.3733 | 1.0158  | -0.1234 |         | 0.6781  | 1.7974  | -6.6439 | -6.6439 |         | -0.454  | -10.7472 |
| hsa-mir-505 | 1       | -6.6439 | 2.2479  | -6.6439 | 1.8875  | 1.5607  | -6.6439 | 2.0875  | 0.4147  |         | -10.7334 |
| miR-214     | 1.6781  |         |         | -6.6439 | 0.848   | 0.3785  | -2.482  | -4.4933 |         |         | -10.7146 |
| miR-515-5p  | -6.6439 | 0.2916  | 1.585   | -6.6439 | 2.2928  | -0.8783 | -2.8997 | 2.3219  | -0.097  |         | -10.6715 |
| miR-191     | -1.8417 | -2.0116 | -0.1297 | -0.1665 | 0       | -2.2863 | -0.8573 | -0.0321 | -5.3219 | 2       | -10.6471 |
| miR-9       | 2.848   | -0.3292 | -1.1456 | -0.1266 | -4.2324 | -0.173  | -2.9214 | -3.0116 | 1.3039  | -2.8468 | -10.6347 |
| miR-7       | 0.107   | -6.6439 | -1.771  |         |         | -1.2793 | -6.6439 | 2.406   | 1.4594  | 1.7866  | -10.5791 |
| miR-199b    | -0.0831 | 0.3173  | 2.2327  | -6.5328 | -1.0985 | 1.511   | 0.8875  | 1.6554  | -2.699  | -6.6439 | -10.4534 |
| miR-370     | -0.7735 | 0.4792  | -6.6439 | 2.406   | 0.1557  | -0.6259 | 0.5361  | 0.7225  |         | -6.6439 | -10.3877 |
| miR-199a    | 0.2558  | 1.9635  | 0.4147  |         | 1.2928  | 0.0229  |         | -1      | -6.6439 | -6.6439 | -10.3381 |
| miR-377     |         | -6.6439 |         | 0.2798  | 0.1519  | 1.6201  | -0.9686 | -6.6439 |         | 2       | -10.2046 |
| miR-522     |         | 1.4854  | -1.3076 |         | 1.3785  | -6.6439 | -0.3921 | -0.2396 | 2.2016  | -6.6439 | -10.1616 |
| miR-433-5p  |         | 1.0704  | -1.4074 |         | -1.2969 |         | -0.6781 | -6.6439 |         | -1      | -9.9559  |
| miR-291-5p  | 1.7974  | -6.6439 | 0.2265  | -0.6781 |         |         | -6.6439 | 1.3505  | -1.1943 | 2       | -9.7858  |
| miR-140     | -0.255  |         |         |         | 0.433   | 0.5281  | -6.6439 | 1.3219  | -3.4066 | -1.7274 | -9.7499  |
| miR-95      | -6.6439 | -4.088  | -0.3921 | 0.7883  | 1.3785  | 0.1966  | 0.4803  | -1.4422 |         | 0.0552  | -9.6673  |
| hsa-mir-193 | 1.4431  | -6.357  | 0.7225  | 0       |         | -6.6439 | -0.3585 | 1.7655  | -0.725  | 0.5049  | -9.6484  |
| miR-23a     | 1.9866  |         | -5.3808 |         | -1.5864 | -6.6439 | 1.406   | 1.7887  | -1.0619 | -0.1329 | -9.6246  |
| miR-376a    | 2       |         | 0.2314  |         | -0.737  | 1.2516  | -0.4921 | -6.6439 | -5.227  |         | -9.617   |
| miR-323     | 0.848   |         | -6.6439 | -6.6439 |         | 1.2588  | 0.2277  | -0.5479 | 1.926   |         | -9.5752  |
| miR-34a     | -6.6439 |         | -0.0559 | 0.0704  | 1.5361  | 1.2928  | -6.6439 | 0.2016  | 0.7655  | -0.0336 | -9.5109  |
| hsa-mir-222 | 1.7442  | 0.4093  | -6.6439 | -3.0469 | -0.2653 | 0.315   | -1.5395 |         | -0.1926 | -0.1633 | -9.383   |
| miR-188     | -6.6439 | -1.3219 | -0.3219 | -0.1844 | 0.5945  | 1.1538  | -4.088  | 0.7655  | 0.6781  | 0       | -9.3682  |
| miR-182     |         | -0.4699 | 0.585   | -6.6439 | -6.6439 | 1       |         | 0.4967  |         | 2.3923  | -9.2837  |
| miR-29c     | -0.5395 | -0.6943 | 1.5236  | -2.8365 |         | -3.9214 | 0.2654  | -1.5395 | -1.4035 | 0.1296  | -9.0161  |
| miR-197     | -3.5977 | -0.5522 | 2.1538  | -6.6439 | -1.1746 | 0.1427  | -0.6371 | 2.1538  | -1.0619 | 0.2016  | -9.0155  |
| miR-423     | -0.488  | 2       | -6.6439 | -0.5649 | -0.0893 | 1.3785  | -0.6552 | 0.8945  | -6.6439 | 1.8278  | -8.9844  |
| miR-17-3p   | -6.6439 | 1.9449  |         | 0.6351  | -6.6439 |         |         | -0.3529 | -0.1714 | 2.3363  | -8.8958  |
| hsa-mir-18  | 0.9635  | 1.4854  |         | -3.1078 | 2.3363  | 2.3923  | -6.6439 | -6.6439 | -1.6259 | 2.121   | -8.723   |
| miR-147     | 2.1043  | -0.1488 | -1.2969 | -3.0831 | -1.3401 | 1.2141  | -1.4422 |         | -6.6439 | 1.926   | -8.7106  |
| miR-25      | 0.5907  | -0.2793 | -6.6439 | 0.1519  | -1.2969 | 0.5588  | 1.8278  | 0.3629  |         | -3.9613 | -8.6893  |
| miR-142-5p  | -6.6439 | 2.0531  | -0.9351 | 2.0531  | 2.1859  | -0.3419 | -2.6529 | -2.4659 | -1.0291 | -0.897  | -8.6737  |
| miR-351     |         |         |         | 0.6304  | -0.4739 |         | -3.0954 | -6.6439 | 2.0531  | -1.0831 | -8.6128  |
| miR-349     | 0.8286  | 2.2928  | -0.3978 | 2.2479  | 0.0704  | 0.9635  | -5.5735 | -4.161  | -6.6439 | 2.0875  | -8.2855  |
| miR-449     | 0.585   |         | 1.1998  | -6.6439 | 0.3219  | 1.585   | 1.433   |         |         | -6.6439 | -8.1631  |
| miR-182     | -6.6439 | 0.3173  |         | 0.7974  | -0.2294 | 1.8797  | -0.144  | -6.6439 | 0.585   | 1.9635  | -8.1183  |
| miR-33      | -0.9518 | 2.0179  | -0.7442 | 0.6323  |         | -1.7959 |         | -0.55   |         | -6.6439 | -8.0356  |
| miR-292-5p  | -2.5995 | 1.511   | -0.1031 | 2.2708  | 0.9635  | -6.6439 | 0.2388  | 2       | 1.0704  | -6.6439 | -7.9359  |
| miR-206     | 0.0524  | -0.5842 | 1.2863  | 0.3346  | -1.8997 | 0.0144  | 0.6397  | -1.4659 | 0.3277  | -6.6153 | -7.91    |
| let-7d      | -6.6439 | 0.4447  | -0.6484 | -6.6439 | 1.3219  |         | 2.1043  |         | 0.4657  | 1.7442  | -7.8554  |
| miR-299-5p  | -6.6439 | 2.121   | 1.8074  | 0.3057  | -6.6439 | -0.0589 | -0.5929 | 0.848   |         | 1.1043  | -7.7532  |
| miR-101     | -0.6038 | -1.5951 | 2.585   | -1.6804 | -0.3346 |         |         | -6.6439 | 0.0635  | 0.5361  | -7.6732  |
| miR-148b    |         | 0.5069  | 1.2054  | 0.8953  | -1.2009 | -6.6439 | 2       | -0.2636 | -6.6439 | 2.4725  | -7.6722  |
| miR-29b     | -2.699  | 2.3329  | -6.6439 | 0.0257  |         | 0.1661  | -2.3884 | -1.8943 | 2.263   | 1.2091  | -7.6288  |

|              |         |         |         |         |         |         |         |         |         |         |         |
|--------------|---------|---------|---------|---------|---------|---------|---------|---------|---------|---------|---------|
| let-7d       | -1.0469 | 1.0356  | 1.5361  | -2.9214 | 0.585   | -6.6439 | 0.6323  | -1.0923 | 0.3573  |         | -7.5582 |
| miR-142-3p   | -6.6439 | -3.0831 | 0.8576  | -0.7108 | -0.5166 | -0.0262 | 2.6323  | -0.7784 | 0.4038  | 0.3774  | -7.4879 |
| miR-465      | 0.0158  | -0.9406 |         | -0.685  | 1.9449  | -6.6439 | 0.9486  | -0.482  | -3.0831 | 1.585   | -7.3403 |
| miR-98       |         | 0.0731  | -1.2619 | 2.6439  | 0.6897  | 0.4255  | -2.6712 |         | -0.486  | -6.6439 | -7.2308 |
| miR-412      |         |         | -6.6439 | 1.7004  | -0.5842 | 1.8074  | -0.0589 | 1.511   | 1.7004  | -6.6439 | -7.2117 |
| miR-302b     | -6.6439 | 0.5361  | 2.3074  | 2.0531  | 2       | 2.5729  | 0.2412  | -3.6082 | -6.6153 | 0.0704  | -7.0863 |
| miR-521      | 2.2928  | -1.0439 |         | -2.5821 | 1.8679  | -6.2109 |         | 0.2154  | -1.949  | 0.3265  | -7.0833 |
| miR-136      | 1.406   | -0.0939 | 1.1375  |         | -1      | 1.4998  | 1.3397  | 2.0179  | -6.6439 | -6.6439 | -6.9808 |
| miR-342      | -0.4521 | -1.2969 | -0.2294 | 0.0786  | -0.6943 | -0.9771 | -0.8186 | -1.1361 | -0.6148 | -0.7539 | -6.8946 |
| miR-29a      | -3.1714 | -0.2447 | -0.3511 | -2.114  | 0.7638  | 0.3033  | 0.8758  | -0.949  | -1.3659 | -0.5842 | -6.8374 |
| miR-127      | -3.0469 | -6.6439 | 0.263   | 0.6608  | -0.6439 | 0.4103  | -0.48   | 0.5548  | 1.2327  | 0.9396  | -6.7535 |
| miR-10b      | -0.5187 | -5.904  | -6.6439 | -0.2636 | 0       | 1.4657  | 0.3885  | 1.4854  | 2.406   | 1.0996  | -6.485  |
| miR-18a      | -0.9105 | 0.2016  | -0.7934 | -1.6215 | 1.406   |         | -0.4481 | 1       | -6.6439 | 1.3357  | -6.4741 |
| miR-518b     | 0.3346  | -4.2029 | -6.6439 | -0.4739 | 1.7368  | 1.4947  | 1.1699  | -0.6349 | -1.1488 | 1.9449  | -6.4235 |
| miR-154      | 0.544   |         | -2.0529 | 1.2327  | 2.278   |         | -1.458  | -1.2176 | 0.9176  | -6.6439 | -6.4001 |
| miR-424      |         | -2.2934 | 2.0179  | -6.6439 | 2.2327  | -1      | 0.9635  | -1.6574 | 0.0496  |         | -6.331  |
| miR-146a     | 1.4152  | -1.9714 | 0.269   | -0.8186 | -0.1424 | -0.4481 | -1.6394 | -2.041  | -0.8916 | 0.1427  | -6.1256 |
| miR-369-5p   |         | -0.5995 |         | -5.553  | 1.2327  |         | 0.1375  |         | 0.144   | -1.4501 | -6.0884 |
| miR-205      | 1.4854  | 1.7004  | -2.8365 |         |         | -0.1943 | -0.0695 |         | -6.6439 | 0.6304  | -5.928  |
| miR-376b     |         |         | -0.2636 |         | -0.1844 | -1.191  | 1.9449  | -0.1649 | 0.5753  | -6.6439 | -5.9276 |
| hsa-mir-146b | 1.3505  |         |         |         |         | 1.8875  | -2.4035 | 0.543   | -6.6439 | -0.5312 | -5.7976 |
| miR-324-3p   | -0.0233 | 1.4201  | -6.6439 |         |         | -6.6439 | 0.9015  | 2.406   | 1.6471  | 1.2016  | -5.7348 |
| let-7g       |         | -1.8468 | 1.1375  |         |         | -1      | 0.7655  | -6.6439 | 1.433   | 0.6323  | -5.5224 |
| hsa-mir-342  | 1.4854  | -2.2793 | 1.2928  | -2.6259 | 0.6781  | 1.5361  |         | -6.6439 | 1.2016  |         | -5.3551 |
| miR-296      | 0.3785  |         | -6.6439 | 0.3219  | 0.263   |         | -0.9269 | 1.3505  |         |         | -5.2569 |
| hsa-mir-28   |         | 2       |         | -1.8836 |         |         | -0.3474 | -6.6439 | 1.7004  |         | -5.1745 |
| miR-347      | -1.1361 | -6.6439 | 3.009   | 2       | -0.2845 | 1.2191  | 1.4297  | 1.5059  | -6.0209 | -0.1811 | -5.1028 |
| miR-148a     | 2.6893  | 0.2016  | -3.9258 | 2.1538  | -0.415  |         | 0.0482  | -6.6439 |         | 0.848   | -5.0438 |
| miR-495      |         |         | -3.4917 | 1.5607  |         |         | 1.8074  | 1.9449  |         | -6.6439 | -4.8226 |
| miR-203      | 1.3505  | -6.6439 | -0.454  | 1.7866  | -1.114  | 2.6893  | -0.5907 | -1.1297 | -0.0847 | -0.5543 | -4.7449 |
| miR-331      | -2.3004 | 1.0704  | 1.7866  |         | 0.229   | -0.9024 | -6.6439 |         | 0.9811  | 1.0854  | -4.6942 |
| miR-34c      |         | 0.7424  | -0.3789 | 0.3874  |         |         | -0.2671 | 1.4854  | -6.6439 |         | -4.6747 |
| miR-153      | -0.5713 | 2.2327  |         | -0.5929 | 0.263   |         |         | -6.6439 | -0.4093 | 1.159   | -4.5627 |
| miR-300      | 0.0398  | 1.5632  | -3.6841 |         |         | -0.816  |         |         | -1.6394 |         | -4.5365 |
| miR-434-3p   | -1.5951 | -1.5951 | 1.2732  | 1.9819  | 0.1257  | 0.9635  |         | 0.8074  | 0.1776  | -6.6439 | -4.5048 |
| miR-518e     | -0.0425 | 1.4641  | -0.274  | -0.0664 | 1.7866  | -0.7637 | 1.9635  | -1.8783 | -6.6439 |         | -4.4546 |
| miR-189      | -0.685  | -0.035  |         | 0.7225  | 2.4463  | -6.6439 | -3.7122 | 2.4463  | 2.5729  | -1.415  | -4.3031 |
| miR-152      | 1.7983  |         | 0.4977  | -6.6439 |         | 0.433   | -0.9078 | 0.6572  |         | -0.038  | -4.2035 |
| miR-372      | 0.543   | 0.1648  | 0.03    | -1.1297 | 2.0704  | 1.8172  | -2.0291 | -4.3511 | -2.0233 | 0.7502  | -4.1576 |
| miR-124a     | -0.0116 | -6.6439 |         | -0.5395 | 0.7373  | 1.2054  | 0.1557  |         | 0.9426  |         | -4.154  |
| miR-93       | -0.811  | -0.4131 | 0.103   | 0.0029  | -0.3529 | -0.456  | 0.0607  | -0.9856 | -1.1424 | -0.0247 | -4.0191 |
| miR-346      | 2.2327  | 1.3092  | -1.221  | -0.8599 | -3.0469 | -6.6439 | 0.7163  | 0.3973  | 1.5534  | 1.5607  | -4.0021 |
| miR-192      | -2.2863 | 0.0786  | 0.189   | -0.8599 | 0.1545  | -1.7563 | 0.4233  | -0.1424 | 0.451   | -0.2142 | -3.9627 |
| miR-215      |         | 0.3022  | -6.6439 | -2.1584 | 0.9305  | 0.044   | -0.4364 | 1.3494  | 1.6554  | 1       | -3.9572 |
| hr-mir-151   | -0.1763 | -0.0755 | 0.1852  | -0.6506 | 0.2461  | -1.7859 | 0.1545  | -0.3921 | -0.1795 | -1.2758 | -3.9499 |
| miR-325      | -1.6349 | -0.3921 | 1.5484  | -1.221  | -0.1746 | -0.3147 | -0.0649 | -0.692  | -0.7346 | -0.2653 | -3.9457 |
| miR-220      |         | 1.5724  |         | -1.1844 | 1.5984  | 1.585   | 0.4308  | 1.4362  | -6.6439 | -2.699  | -3.9045 |
| hsa-mir-92-1 | 0.0922  |         |         | 0.9635  | -6.6439 | -1.8678 | 1.2271  | 1.263   |         | 1.2079  | -3.758  |
| miR-302a     | -0.9771 | -2.4422 | -1.1297 | 0.6517  | 0.9598  | 0.8074  | 1.6631  | 0.4125  | -0.6215 | -2.8997 | -3.5757 |

|               |         |         |         |         |         |         |         |         |         |         |         |
|---------------|---------|---------|---------|---------|---------|---------|---------|---------|---------|---------|---------|
| miR-373       | -6.6439 | -0.5929 | -0.243  | -1.8678 | 1       | -0.0679 | 0.648   | 1.3505  | 1.923   | 0.926   | -3.568  |
| miR-219       | -6.6439 | 0.0704  | 0       | -0.6171 | 0.7493  | 0.0772  | 0.4854  | 2       | -0.3456 | 0.6627  | -3.5616 |
| miR-193a      | -6.6439 | 2.0875  | 0.5926  | -1.0321 |         | 0.6323  | 0.3785  |         | 0.8711  | -0.4403 | -3.5543 |
| miR-466       | -1.2515 | -0.9296 | 1.319   | -1.1943 | 0.4383  | -0.6967 | -0.1031 | -0.3752 | -0.0634 | -0.6282 | -3.4847 |
| let-7i        | 2.8875  | 0.1414  | 0.0676  | -1.9942 | 1.101   | -0.9686 | -0.1746 | 0.9486  | -2.4035 | -3.035  | -3.4298 |
| miR-138       | 1.5748  | 1.9635  | -6.6439 |         | -0.9351 | 0.5607  | -0.4305 | 1.9542  | -2.3364 | 0.8711  | -3.4216 |
| miR-9         | 1.7004  | 1.263   | 0.2892  | -0.8468 | -6.6439 | 0.9753  | 0       |         | 0.8647  | -0.852  | -3.2501 |
| miR-30e-3p    | 0.2016  |         | -6.6439 | 1.2768  | 0.0328  |         | -0.3789 | 0.8024  | 1.6088  | -0.1456 | -3.246  |
| miR-106b      | 0.4647  | 0.1243  | -0.6148 | -0.9379 | -0.486  | -0.3659 | -1.2793 | -0.3978 | 0.9986  | -0.7155 | -3.2096 |
| miR-129       | -0.7442 |         | 1.3746  | 1.3219  | -1.7418 | 1.4547  | 0.1375  | 1.6781  | -6.6439 | 0       | -3.1631 |
| miR-324-5p    | -1.191  | -0.5778 | -0.4739 | -1.2515 | 0.1738  | -1.7274 | 0.9381  | -0.0365 | -0.7346 | 1.748   | -3.1328 |
| miR-295       | -6.6439 |         | 1.2016  | -0.3566 | -0.7661 |         | 0.4854  | 1.433   | 0.926   | 0.6378  | -3.0828 |
| miR-411       | 0       | 1.6554  | 0.0976  | 1.1551  | 2.2016  | -0.2969 |         | -6.6439 | 1.3907  | -2.5146 | -2.955  |
| miR-503       | -0.0499 | 2.1375  |         | 0.189   | -1.041  |         | 2.0875  | 0.433   | -6.6439 |         | -2.8878 |
| miR-20a       | -0.3183 | -0.8288 | -0.4247 | -0.2226 | 0.2314  | 0.0286  | -0.1779 | -0.0786 | -0.9379 | -0.0862 | -2.815  |
| miR-107       | -0.2464 | 0.2963  | -1.3147 | 0.0257  | -0.0189 | -1.3585 | 0.315   | -0.5374 | 0.0172  | 0.0144  | -2.8073 |
| miR-433       | -1.4344 | 1.3219  | 1.7442  |         | 2.0356  | -6.6439 |         |         | -0.3696 | 0.5597  | -2.7865 |
| miR-135a      | -1.071  | 0.6763  | -1.685  | 1.3757  | -1.5395 | -0.0262 | -1.2109 | 0.3494  | -0.486  | 1.0902  | -2.527  |
| miR-103       | -0.0786 | -0.1062 | -0.4481 | -0.4961 | 0.8319  | -1.3219 | -0.2142 | 0.5675  | 0.2987  | -1.5228 | -2.4898 |
| miR-130b      |         |         | 1.4594  | -1.1779 | -0.3111 | -0.1125 | 2.3363  | 2.5361  | -6.6439 | -0.527  | -2.4406 |
| miR-26b       | -0.1203 | -1.4035 | 0.6717  | -0.3529 | -0.0634 | -0.9187 | -1.3622 | 0.8584  | 0.848   | -0.5821 | -2.425  |
| miR-463       | 0.8875  | 0.5529  | 1       | 0.1545  | 1.0545  | 1       | -0.5395 | 0.1699  |         | -6.6439 | -2.3641 |
| let-7b        | 0.0895  | -0.1617 | -0.1649 | -1.2481 | 0.4489  | -0.4521 | -0.3529 | -0.8625 | -0.7612 | 1.1454  | -2.3196 |
| miR-333       | -0.1568 | 1.2516  | 0.2004  | 1.5607  | -5.1482 | -1.7909 | 0.4657  | -0.3978 | 1.7225  | 0       | -2.2928 |
| miR-291-3p    | 0.7655  | -0.1488 | 0.541   | 0.1878  |         | -6.6439 | 0.2154  |         | 1.2327  | 1.585   | -2.2653 |
| miR-344       |         | 2.1519  | -4.6188 | 2.7866  | 1.3357  | -0.8468 | 0.585   | -6.6439 | 2.7549  | 0.2869  | -2.2085 |
| miR-187       | -1      | 0.2412  | -6.6439 | 1.8074  |         | 0.926   |         | 1.926   | 0.6781  | -0.1297 | -2.1949 |
| miR-200a      | 1.2928  | 0.696   | 0.3219  |         | -6.6439 |         |         |         | 1.2035  | 1       | -2.1297 |
| miR-302b      | 0.2987  | -1.5437 | -0.9296 | 0.2606  | 1.1603  | -0.0544 | 1.3606  | -1.5146 | 0.2339  | -1.3959 | -2.1241 |
| hsa-mir-520c  |         |         |         |         |         |         |         |         |         |         |         |
| , hsa-mir-520 |         |         |         |         |         |         |         |         |         |         |         |
| b, hsa-mir-52 |         |         |         |         |         |         |         |         |         |         |         |
| Of            |         |         |         |         |         |         |         |         |         |         |         |
| miR-126       | 0.1916  | -0.1552 | -0.7013 | 0.3984  | 0.9501  | 1.2388  | -1.9942 | -0.8084 | -0.226  | -0.9296 | -2.0358 |
| miR-17-3p     | 1.585   |         | -6.6439 |         | -1.415  | 1.7442  |         | 1.926   | 0.8172  | -0.0439 | -2.0304 |
| miR-211       | 0.0704  | 1.3785  | 0.2594  | 2.1375  | -0.0233 | -3.1844 | -1.2413 | 1.5361  |         | -2.9105 | -1.9776 |
| miR-350       | 0.1557  |         | 0.5018  | -6.6439 | -0.3346 | 2.5484  | -0.2533 | 0.1375  | -0.3165 | 2.2479  | -1.957  |
|               | -0.2294 | 0.779   | -0.7909 | 0.3896  | -0.5249 | 0.5351  | -0.9971 | -0.1488 | -0.1078 | -0.7612 | -1.8564 |
|               | 0.1467  | -0.304  | 0.308   | 0.4594  | -0.3959 | -1.0559 | 0.0014  | -0.6416 | -0.1219 | -0.1456 | -1.7494 |
| miR-140       | -0.1031 | -0.9051 | 0.9351  | -0.1361 | -0.7588 | -0.3789 | -0.8339 | -0.1062 | 0.926   | -0.3201 | -1.6811 |
| miR-10b       | -0.949  | -1.8365 | -0.0559 | -1.221  | 1.3835  | 1.6055  | 0.2473  | -0.8651 | 0.7181  | -0.6016 | -1.5747 |
| miR-92        | 0.2522  | -0.4286 | -0.4093 | -0.4901 | 0.4436  | -0.8443 | -0.9379 | -0.6171 | 0.6727  | 0.7916  | -1.5672 |
| miR-196b      | -0.9799 | -3.7939 | 0.9389  | 0.3606  | 1.7506  | 0.6663  | 0.3651  | 0.3885  | -1.4779 | 0.2265  | -1.5552 |
| miR-320       | 0.2666  | 0.0635  | -0.0306 | 0.08    | -0.0604 | -0.097  | -0.0087 | 0.0144  | -0.8314 | -0.8468 | -1.4504 |
| miR-434-5p    | 0.7137  | 0.7251  | -1.7612 | 1.0314  | -1.2042 | -1.3255 | 0.7225  | 0.2016  | -0.5084 | 0.103   | -1.302  |
| miR-23b       | 0.6239  | -0.1313 | -0.2987 | -0.4679 | 0.263   | 1.3265  | -0.4112 | -0.2775 | -1.071  | -0.8262 | -1.2704 |
|               | 0.6835  | -0.3511 | -0.4286 | 0.0496  | 0.0663  | 0.0144  | -0.1697 | 0       | -0.3902 | -0.699  | -1.2248 |
| miR-341       | -0.1078 | 1.585   |         | 0.6323  | 1.406   | -0.6371 | -6.6439 | 0.6323  | -0.0559 | 1.9819  | -1.2072 |
| miR-30b       | -1.3959 | 0.3896  | -1.0954 | 0.7049  | 0.7242  | -0.6943 | -0.2863 | 0.9479  | 0.9426  | -1.3659 | -1.1286 |

|             |         |         |         |         |         |         |         |         |         |         |         |
|-------------|---------|---------|---------|---------|---------|---------|---------|---------|---------|---------|---------|
| miR-30d     | -0.7418 | 0.9613  | 0.099   | -0.9856 | 0.45    | -0.6552 | 0.4885  | -1.074  | 0.0731  | 0.3115  | -1.0732 |
| miR-190     | 0.976   | 0.6323  | -6.6439 | 0       |         | 1.5361  |         | 0       | 0.7049  | 1.7655  | -1.0291 |
| miR-345     | 1.9624  | 2.1043  | 0.1017  | -0.5043 | 1.1699  | -0.749  | -0.1062 | -6.6439 | 0.3951  | 1.4594  | -0.8106 |
| hsa-mir-339 | 0.269   |         |         | 1.0356  |         | 1.511   | -5.088  |         | 1.5405  |         | -0.7319 |
|             | 1.0956  | -0.9434 | 0.0759  | -0.0755 | 0.1137  | 0.0129  | 0.4201  | -0.1456 | 0.0029  | -1.1456 | -0.589  |
| miR-380-5p  | -3.872  | -2.0893 | 2.2801  | -0.0634 | 1.6088  | -0.8084 | -1.4739 | 1.7858  | 0.8464  | 1.2327  | -0.5532 |
| miR-144     | 0.3219  | -0.4074 | -0.3237 | -0.1109 | -0.0559 | 1.0983  | 0.4005  | -0.2042 | -0.3696 | -0.7959 | -0.4469 |
|             | -0.2845 | -0.191  | 0.4772  | -0.7515 | -0.0801 | -0.3585 | 0.3448  | -0.7959 | 0.9811  | 0.2154  | -0.443  |
| miR-378     | 0.2091  | 0.3448  | 2.3735  | 1.9069  | 2.6439  |         | -3.422  | -6.6439 | -0.4286 | 2.5969  | -0.4194 |
| miR-17-5p   | -0.3328 | -1.2176 | -0.0145 | -0.5735 | -0.2176 | 0.992   | 0.338   | -0.1187 | 0.6608  | 0.0718  | -0.4121 |
| miR-346     | 0.2702  | -0.7612 | 0.545   | 1.8631  | -0.0072 | -1.3548 | -0.5002 | -0.3511 | 1.6332  | -1.7226 | -0.3856 |
| miR-200b    | 0.6544  | 2.2327  | 2.3219  |         | -6.6439 | 0.1043  | 2.4854  | -0.852  |         | -0.6597 | -0.3569 |
| miR-515-3p  | 1.3679  | 0.099   | 0.7225  |         |         | 1.1622  | -6.6439 | 1.7225  | 1.4594  | -0.2277 | -0.3381 |
| miR-15a     | 0.0745  | 0.1801  | 0.3196  | -0.1456 | -0.1234 | 0.0454  | 0.1283  | -0.3827 | -0.1877 | -0.1779 | -0.2694 |
| miR-186     |         |         | 0.2522  | 1.5607  | -6.6439 | 1.8679  | 1.8278  | -0.3147 |         | 1.2016  | -0.2484 |
| miR-363     | 0.3918  | 0.9471  | 0.9583  | -1.4659 | 1.0614  | -0.2176 | -0.46   | 0.9531  | -0.725  | -1.5479 | -0.1047 |
| miR-191     | -0.5353 | 0.929   | -0.2863 | -0.2898 | -0.5291 | -0.1456 | 0.9672  | 0.3528  | -0.4305 | -0.0425 | -0.0101 |
| miR-184     | -0.1109 | -1.3111 | -0.2176 | 1.4033  | 0.3606  | 1.0929  | 1.6599  | 0.5724  | -2.4901 | -0.949  | 0.0104  |
| let-7a      | -0.2934 | 0.7146  | -0.8417 | -0.6529 | 1.2516  | 0.2388  | 0.0676  | -0.9771 | 0.539   | 0.0086  | 0.0551  |
|             | 0.4552  | 0.4372  | 0.2339  | -0.46   | -1.2243 | -0.5735 | 0.229   | -0.3696 | 1.0236  | 0.308   | 0.0595  |
| miR-302a    | -1.7612 | 1.6323  | 0.8278  | -0.4208 | 1.0356  | 1.6064  | 2.4594  | 0.8608  | 0.474   | -6.6439 | 0.0704  |
| miR-27a     | -0.9574 | 0.1738  | 0.0841  | -0.5907 | -1.1203 | 0.472   | 0.2497  | 1.3248  | 0.8049  | -0.3659 | 0.075   |
| miR-101b    | 1.8679  |         | -0.2379 | 1.848   | 1.433   | 2.3074  | -1.5864 |         | 1.2016  | -6.6439 | 0.1897  |
| miR-195     | 0.4489  | 0.2904  | 0.0635  | 0.3863  | 0.0215  | -0.8135 | 0.0412  | -0.2934 | 0.1003  | -0.038  | 0.2072  |
| miR-352     | 1.1336  | -2.8573 | 0.115   | 0.848   | 0.5341  | -3.0469 |         | 0.7655  | 0.9635  | 1.7655  | 0.221   |
| hsa-mir-425 | 0.1789  | 2.2129  | -2.2311 | -2.1584 | -0.0291 | -1.8625 | 0.3115  | 2.3528  | 0.9084  | 0.5568  | 0.2402  |
|             | -0.1472 | 0.9404  | -0.6349 | 0.4813  | 0.1124  | 1.2546  | -1.1392 | -0.6484 | 0.1283  | -0.0695 | 0.2778  |
| miR-15b     | 1.1519  | -1.1203 | 0.3885  | -1.1329 | -0.7784 | -0.394  | -0.125  | -0.486  | 1.0996  | 1.6933  | 0.2967  |
| miR-27b     | -1.0619 | 0.2154  | 0.6799  | 0.809   | -0.6552 | 0.6599  | 0.3346  | -0.5416 | -0.364  | 0.24    | 0.3161  |
| miR-375     |         | 1.6088  | -6.6439 |         | 1.406   | 1.6323  | 1.0704  | -3.1203 | 2.1538  | 2.2327  | 0.3398  |
| miR-224     | -0.3165 |         | -2.0116 | -0.0499 | -1.873  | -0.2328 | 1.7004  | -0.5564 | 2.6893  | 1       | 0.3495  |
|             | 0.8875  | 0.103   | 0.0115  | 0.5301  | -0.1047 | -0.1959 | -0.2294 | -0.662  | 0.2066  | -0.1361 | 0.4106  |
|             | 1.1322  | -0.2277 | 0.6808  | -0.0291 | 0.2892  | 0.6663  | 0.4813  | -0.7202 | -1.0954 | -0.6943 | 0.4831  |
| miR-290     | -1.4035 |         | 1.3219  | 2.2327  | -6.6439 | 1.3219  | 1.3785  | -0.5973 | 0.7225  | 2.1859  | 0.5187  |
|             | 0.8528  | -0.8186 | -1.3771 | 0.3426  | -0.1552 | 0.1674  | 0.6022  | -0.6126 | 0.8319  | 0.7321  | 0.5655  |
| miR-20b     | -0.0218 | -0.8863 | 1.1408  | -0.4759 | -0.041  | 1.0976  | 0.543   | -1.2379 | 0.2904  | 0.1966  | 0.6055  |
| let-7f      | 0.2054  | 0.852   | -0.3076 | -0.0544 | -0.0679 | -0.3165 | -0.1828 | -1.0145 | 0.7442  | 0.7715  | 0.6294  |
|             | 0.545   | 0.2054  | 0.2546  | 0.294   | 0.0129  | -0.0306 | -0.9434 | -0.1536 | -0.2653 | 0.7824  | 0.7014  |
| let-7c      | 1.5069  | -0.3328 | 1.8949  | 0.7286  | -0.881  | -0.0893 | -0.4779 | 0.6425  | -2.071  | -0.1697 | 0.7512  |
|             | -0.3292 | -0.1633 | 0.3829  | 0.3606  | 0.6699  | 0.7991  | -0.5332 | -0.0725 | 0.1852  | -0.5249 | 0.7746  |
| miR-337     | 0.1738  | -1.8997 | 2.3505  | 0.9199  | 1.7866  | 3.2172  | -1.5312 | -1.1877 | -2.7859 | -0.2379 | 0.8056  |
|             | -0.9296 | -0.7686 | -0.1313 | 0.2762  | 0.315   | 0.0314  | 1.1336  | 0.1532  | 0.8536  | -0.1266 | 0.8069  |
|             | -0.7784 | 0.9899  | 0.451   | 0.3896  | 0.5281  | 0.8576  | -0.8034 | -0.0574 | -0.0755 | -0.6735 | 0.828   |
| miR-200c    | -2.4982 | 2.7115  | 0.3584  | -3.357  | -0.1219 | 0.8813  | -1.3183 | 1.4179  | 1.972   | 0.8148  | 0.8605  |
| miR-106a    | -0.3004 | 0.584   | 0.1966  | -0.1568 | 0.3403  | 0.1532  | 0.8608  | 0.6154  | -1.2793 | -0.0755 | 0.9383  |
| miR-7       | -6.6439 |         |         | 2.0179  | 1       |         |         | 0.5008  | 1.7004  | 2.3923  | 0.9675  |
| miR-106a    | 0.0243  | 0.5646  | -0.0189 | -0.3419 | 0.2485  | 0.6599  | -0.2619 | -0.1552 | 0.4005  | -0.0923 | 1.0276  |
| miR-301     | -0.5249 | 0.8844  | 2.0243  | -1.0233 | 1.1057  | -2.8573 | -0.9462 | -0.0529 | 2.6339  | -0.1665 | 1.0772  |
| miR-381     | -0.6666 | 1.7527  | -1.6897 | -0.2059 | 0.6323  | 1.1859  | 1.585   | 0.0676  | -1.889  | 0.315   | 1.0873  |

|                |         |         |         |         |         |         |         |         |         |         |        |
|----------------|---------|---------|---------|---------|---------|---------|---------|---------|---------|---------|--------|
| miR-374        | 2.1859  | 0.5965  | 1.9624  | -1.9771 | -0.3603 | -2.7959 | -1.0291 | 0.7672  | 0.0621  | 1.7799  | 1.1916 |
| miR-151        |         | 0.263   | -0.4739 | 0.9635  | 1.3219  | 0.7225  | -1.776  |         | 0       | 0.3414  | 1.3624 |
| miR-99b        | -0.1109 | 0.3022  | 0.5079  | 0.4792  | -0.3346 | 0.515   | -0.1959 | -0.0619 | -0.2026 | 0.5291  | 1.4275 |
| miR-335        | 0.4751  | -0.771  | 0.7066  | -0.9714 | 1.0888  | 0.6135  | -0.3058 | 0.5079  | 0.0454  | 0.0649  | 1.454  |
| miR-26a        | -0.6804 | 0.1903  | 0.6699  | 0.294   | 0.184   | 0.4552  | 0.5782  | 0.315   | 0.2079  | -0.749  | 1.4651 |
|                | 0.5666  | -0.274  | 0.5627  | 0.9833  | -0.3733 | -0.1031 | -0.2159 | 0.688   | 0.1789  | -0.4921 | 1.5211 |
| miR-429        | -2.7274 | 1.4594  | 0.6323  | 0.0314  | 2.0531  | -0.1779 | -1.5395 | 0.8875  | 0.0963  | 1.0704  | 1.7856 |
| miR-30e-5p     | 1.5724  | 3.0339  | -0.2916 | 2.2461  | -4.0685 | 0.0704  | -0.5002 | -0.6529 | 1.0179  | -0.5973 | 1.8302 |
|                | -0.2328 | -0.1943 | -0.2092 | -0.4679 | 0.7841  | 0.115   | -0.3364 | 0.6654  | 1.0433  | 0.7058  | 1.873  |
|                | -0.5606 | 0.4103  | 0.3254  | 0.3651  | 0.0144  | 0.9434  | -0.4941 | 0.0745  | 0.6951  | 0.115   | 1.8885 |
| miR-19a        | 0.4668  | 0.6727  | 0.6754  | 0.6069  | 0.4542  | -0.2193 | 0.9107  | -0.454  | -0.6394 | -0.5799 | 1.8941 |
| miR-196a       | 0.7949  | 1.1043  |         | -0.1172 | 1.0704  | -0.5585 | 0.4594  | -0.0454 | 2.121   | -2.9105 | 1.9184 |
| miR-329        | -4.8954 | 1.8278  | 0.4875  | 2.081   | 0.3161  |         |         | 0.3807  | 1.7502  |         | 1.9479 |
| miR-451        | 0.5539  | -0.6506 | 0.0949  | 0.5878  | 0.2228  | 1.237   | -0.394  | 0.3685  | -0.3997 | 0.3346  | 1.9552 |
| miR-130a       | -0.5043 | -0.1665 | 0.7587  | -1.9714 | 1.2461  | 0.4636  | -0.8314 | 1.4044  | 1.4885  | 0.1865  | 2.0742 |
| miR-155        | -1.4035 | 0.1814  | 0.6654  | 0.315   | -1.4189 | 0.3696  | 0.9553  | 0.7849  | 0.2154  | 1.419   | 2.0836 |
| hsa-mir-519a-2 | -0.7084 | -1.3511 | 0.6645  | -0.1649 | 1.9819  | -0.5649 | 1.8074  |         | 0.3219  | 0.157   | 2.1434 |
| miR-20         | 0.1801  |         | -0.8573 | 2.406   | 0.0676  | -0.3094 | -0.6171 | 2.0179  | 0.2654  | -1      | 2.1532 |
| miR-471        | 0.2461  | 0.5588  | -1.0801 | -0.9269 | 0.3651  |         | 1       | -0.486  | 1.2382  | 1.3161  | 2.2313 |
| mir-527        | 1.511   | -0.5228 | -2.4901 | -0.4364 |         | -0.7442 | 2.0222  | -0.16   | 2.8278  | 0.2762  | 2.2837 |
| miR-362        |         | -0.2636 |         |         |         |         | -0.881  | 1.5656  | 1.9069  | 0       | 2.3279 |
| hsa-mir-423    | -0.0336 | 0.827   | -0.7108 | -0.7155 | 0.24    | 0.2116  | -0.0484 | 1.2951  | 1.1077  | 0.2302  | 2.4033 |
| miR-223        | 1.6187  | -0.4921 | 0.7706  | -0.7588 | -0.48   | 1.5286  | -0.7322 | -0.7226 | 0.6341  | 1.0426  | 2.4089 |
| miR-30a-5p     | 1.3288  | -0.5125 | 1.2382  | 2.6893  | -0.3292 | 1.2016  | -2.3659 | -0.4739 | 0.2016  | -0.55   | 2.428  |
| miR-198        |         | -1.6712 | 2.0875  |         | -3.2379 | 1.6554  | 0.7163  |         | 0.3219  | 2.585   | 2.457  |
| miR-32         | -1.0679 | 0.1506  | 0.8695  | -0.0801 | 0.0718  | -1.7418 | 0.719   | 0.844   | 1.9305  | 0.903   | 2.5986 |
| miR-336        | 2.991   | 0.1414  | 0.2726  | 0.1661  | 0.3242  | 0.7866  | -0.5951 |         | -0.1877 | -1.0087 | 2.8904 |
|                | -0.3884 | 1.1276  | 0.5069  | 1.0996  | 0.5984  | -0.1187 | 1.0264  | 0.0786  | -0.0786 | -0.8625 | 2.9893 |
| miR-343        | 1       | -0.2636 | 1.7655  | 1.3962  | -2.4112 |         | 1.5351  | -1.9051 | -0.097  | 2       | 3.0199 |
| miR-373        | 1.6323  | 1.3219  |         | 1.585   | 0.111   |         |         |         | 0.0201  | -1.6394 | 3.0309 |
| miR-213        | 2.1519  | 0.4049  | 2.1699  | -6.6439 | 2.5729  | -0.1016 | -0.1282 | 0.7655  | 2.5236  | -0.6016 | 3.1134 |
| miR-16         | 0.6229  | -0.6394 | 0.2738  | 0.5049  | 0.4542  | 0.6031  | 0.3033  | 0.5568  | -0.415  | 0.8711  | 3.1357 |
|                | -0.1681 | 0.1801  | -0.2898 | -0.2176 | -0.3111 | 0.8205  | 1.1197  | 0.9426  | 0.144   | 1.1104  | 3.3307 |
| miR-19b        | -0.1993 | 0.5597  | 0.251   | 1.2881  | 0.5753  | 0.9986  | 0.1362  | 0.6248  | 0.1349  | -0.7322 | 3.6371 |
| miR-129-3p     | 1.3516  | 0.9169  | 0.229   | 0.6826  | 0.6654  | -1.1681 | -0.2092 | 0.4147  | 0.4114  | 0.3516  | 3.6459 |
| miR-330        | 0.5753  | 2.3329  | 0.6498  | 0.3311  | -0.4016 | 1.858   | 1.585   | 2.1538  | -6.6439 | 1.4201  | 3.8605 |
| miR-134        | -1.4659 |         | -1.1203 | 2.121   |         | 1.7655  |         |         | 0.3752  | 2.2172  | 3.8927 |
| miR-126        | 1.0172  | 0.189   | -0.5395 | -0.4266 | 0.3929  | -0.0679 | 0.965   | 1.1878  | 0.9657  | 0.2558  | 3.9394 |
| miR-215        | 0.669   | 0.1375  | -0.7809 | 2.6206  | 1.4125  | 0.3219  | -0.484  | -1.077  | 0.3528  | 0.7807  | 3.9531 |
| miR-133a       | -1.255  | 0.1375  | -0.1568 | -0.0649 | 1.5361  | 1.2684  |         | 2.3074  | -0.6193 | 0.8024  | 3.9558 |
|                | 1.0656  | 0.1801  | 0.2857  | -0.394  | 0.0813  | 1.0895  | 1.168   | -1.5353 | 1.4152  | 0.6003  | 3.9564 |
| miR-22         | -6.6439 | 1.7442  | 1.9069  | 0.7225  | 2.3646  | 1.4854  | 1.5361  | 1.1375  | 0.1467  |         | 4.4    |
| let-7g         | -0.0072 | -0.737  | 1.129   | 0.5763  | 0.0496  | -0.2688 | 1.2887  | 1.1157  | 1.0724  | 0.9381  | 5.1568 |
| miR-133b       | 2.6629  | 0.0759  | 1.6631  | -0.6148 | -1.6439 | -2.5821 | 0.7416  | 0.7655  | 2.511   | 1.8074  | 5.3866 |
| miR-28         | -0.949  |         | 2.1699  |         |         | -1.6897 | 1.6554  | 2.1375  | 0.433   | 2.0356  | 5.7927 |
| miR-468        | -0.5312 | -0.2951 | 0.5811  | 0.7698  | 0.9411  | -0.4679 | 0.6924  | 2.7225  | 2.281   | -0.7226 | 5.9711 |
| miR-297        | 2.2327  | 0.2558  | 1.6323  |         |         | 2.1375  |         | 0.4542  | -0.3022 |         | 6.4103 |
| miR-294        | 1.6088  | 0.8875  |         | 0.107   | -1      |         | 1.4683  | 2.2172  |         | 1.1699  | 6.4587 |

|             |        |         |        |         |        |        |         |         |        |        |         |
|-------------|--------|---------|--------|---------|--------|--------|---------|---------|--------|--------|---------|
| hsa-mir-19a | 0.8875 | 0.5361  | 1.433  | 0.2016  | 1      | 1.4854 |         |         | 1.6323 |        | 7.1759  |
| miR-200a    |        | -0.4901 | 1.1237 | 0.4916  |        | 2.2928 | 0.2016  | 0.4895  | 2.0704 | 1      | 7.1795  |
| miR-299-3p  | 0.1699 | 2.0704  | 2      | -1.2379 | 1.6708 | 0.8512 | -1.2277 | -1.8943 | 1.6699 | 3.121  | 7.1933  |
| miR-125b    | 2.517  | 3.1859  | -1.221 | 0.7268  | 2.0356 | 2.2928 | -1.8836 | 1.8875  | 0.2179 | 0.2388 | 9.9977  |
| miR-139     | 1.8875 |         |        | 2.6668  | 0.2892 | 0.2558 | 1.6699  | 2.2801  | 2.5607 |        | 11.61   |
| miR-100     | 2.2479 | -0.0499 | 0.6323 | -1.6943 | 1.7004 | 2.6439 | 0.6257  | 2.9069  | 2.4931 | 1.9819 | 13.4879 |
| miR-155     | 3.0515 | 2.5509  | 2.1437 | 2.1938  | 2.1483 | 2.9592 | 3.1431  | 2.0742  | 3.2472 | 2.4404 | 25.9523 |
| miR-221     | 4.2365 | 3.0206  | 2.7879 | 3.4155  | 3.9495 | 4.1326 | 2.4668  | 3.1032  | 2.7058 | 3.0688 | 32.8872 |
| miR-21      | 5.6929 | 8.1431  | 6.7879 | 7.47    | 6.5486 | 6.8354 | 8.2946  | 6.3029  | 8.2654 | 8.0806 | 72.4214 |
