# Supplementary material for: A Meaningful Strategy for Glioma Diagnosis via Independent Determination of hsa_circ_0004214
Source: MDPI journal article supplement (doi:10.3390/brainsci13020193), 2023-01-23
Supplement: s1 [file s1]

1. FISH-probe(hsa\_circ\_0004214)

|                   |             |                       |        |
|-------------------|-------------|-----------------------|--------|
| Name :            |             | Fish probe            |        |
| Sequence(5'to3'): |             | GTTCTTGGCGTGCTGACTGG  |        |
|                   |             |                       |        |
| Lot No. :         | AX203112439 | Length :              | 20     |
| Purification :    | HPLC        | Modification(5'to3'): | 5`Cy3  |
| nmoles:           | 10.86       | Add water to 100uM:   | 108.6  |
| TM(°C) :          | 61.9        | GC(%) :               | 60     |
| MW (target):      | 6694        | MW(observed):         | 6692.7 |
| Conclusion:       |             | Qualified:            |        |
| Inspector:        |             | Auditor:              |        |

FIG1

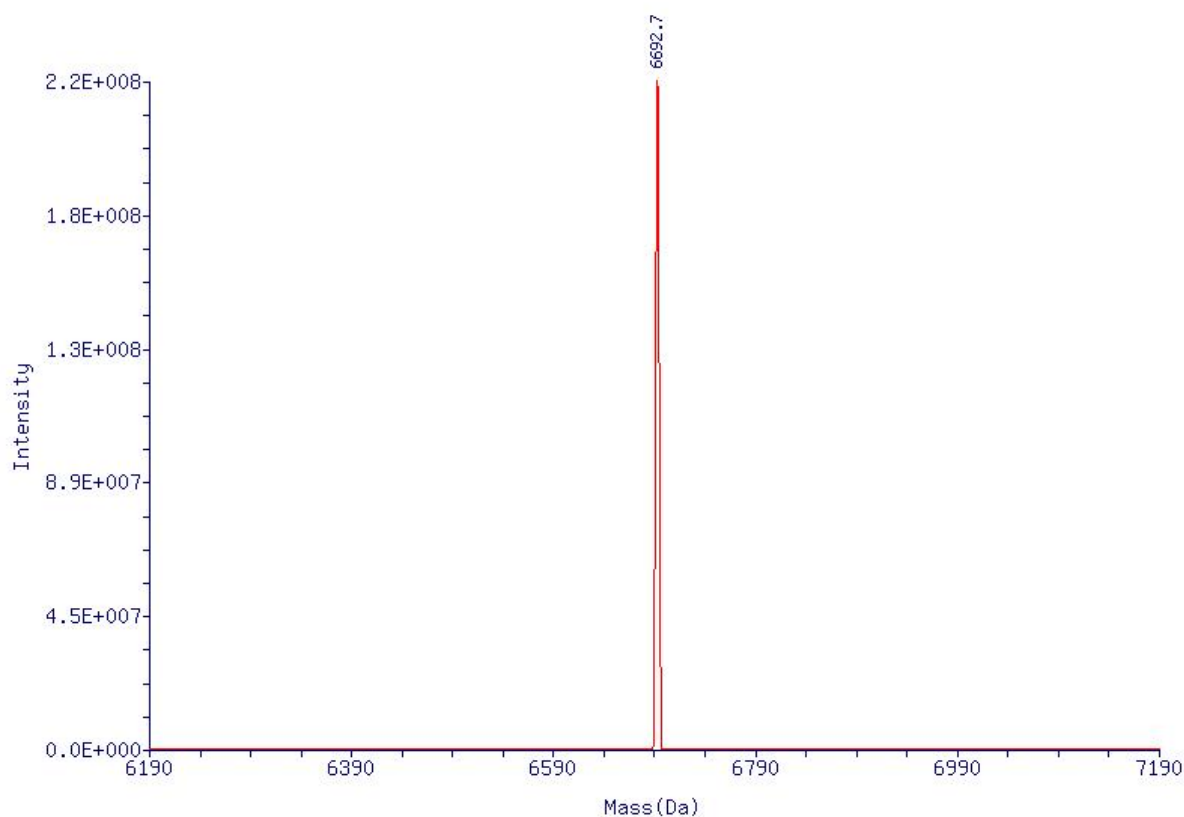

ESI - MS FIG1

2. CircAMOTL1 (hsa\_circ\_0004214) full-length gene.

TTGAAGATCCTCTTTGTAACCTCCACTCCCCAACTTCCTGAGGATCTCAGAGGTGGAAATGAGAGGTCCGAGGATGCGGCAGCTGGAA  
CAGTATTGCAGCGGCTGATCCAGGAACAACCTGCGGTATGGCACCCCAACCGAGAACATGAACTTGCTGGCCATTGAGCACCAGGCCACA  
GGGAGTGCAGGACCAGCCATCCTACAAACAACCTTTCTTCACGGAAAACCTCACTCAAGAAGACCCACAAATGGTCTACCAGTCAGCA  
CGCCAAGAACCGCAGGGTCAAGAACACCAGGTGGACAATACGGTGATGGAGAAACAGGTCCGGTCCACGCAGCCTCAGCAGAACAACG  
AGGAACTGCCACTTACGAGGAGGCCAAAGCACAGTCGCAGTTCTTCAGGGGGCAGCAGCAGCAGCAACAGCAGCAGGGGGCGGTGG  
GCCATGGTTACTACATGGCAGGGGGCACCAGTCAGAAGTCCCGAAGTGAAGGGAGGCCCACTGTGAACCGTGCCAACAGTGACAGGC  
GCATAAGGACGAGGCGCTGAAGGAAGTGAAGCAGGGCCACGTCCGCTCGCTCAGCGAGAGAATCATGCAGCTGTCCCTGGAGAGGAAT  
GGGGCCAAGCAACACCTTCCCGGCTCGGGGAATGAAAGGGCTTCAAAGTAGGAGGGGGGCCCTCCCCTGCCAGCCTGCAGGTAAA  
GTGCTGGACCCTCGGGGTCTCCACCTGAGTACCCCTCAAGACCAAGCAAATGATGTCCCAGTCAGCAAGACCCAGGAGCACGGACT  
TTTTTATGGTGACCAGCACCCGGGATGCTCCACGAGATGGTCAAGCCCTACCCTGCTCCTCAGCCTGTGAGAACAGATGTGGCCGTCTCTG

CGGTACCAGCCACCCCCTGAGTATGGGGTAACGAG

3. Plasmid information. pcDNA3.1(+) CircRNA Mini Vector

FIG3

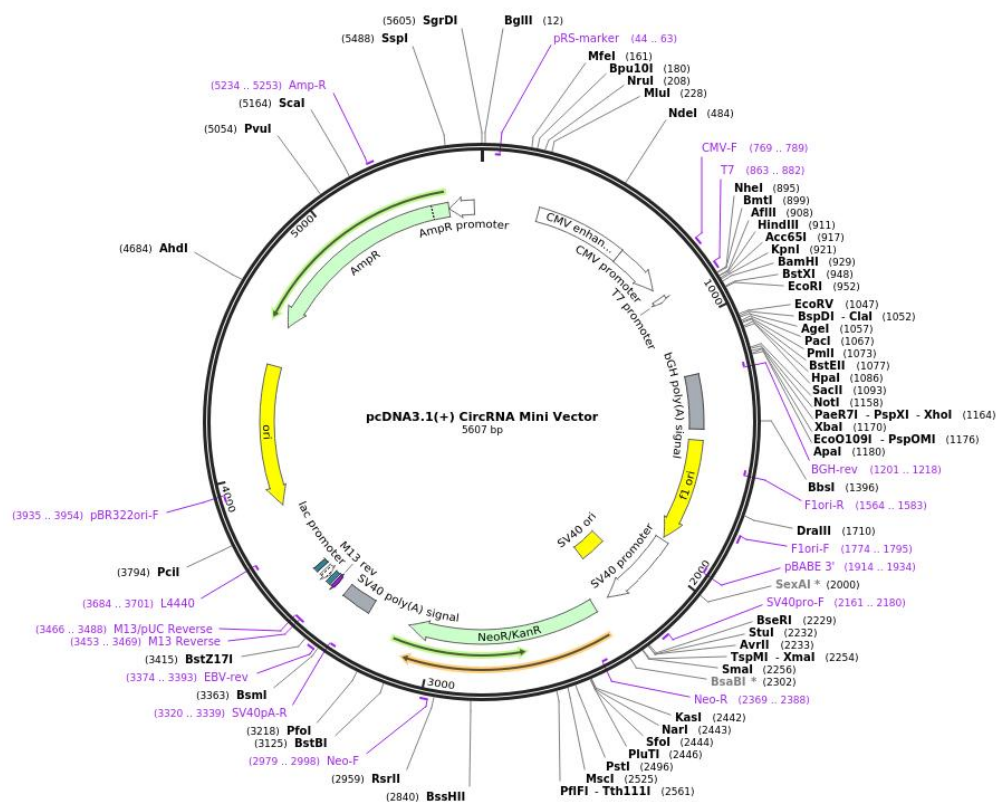

|       |                                 |                |                          |
|-------|---------------------------------|----------------|--------------------------|
| LOCUS | pcDNA3.1(+) CircRNA Mini Vector | 5607 bp ds-DNA | circular SYN 10-JAN-2018 |
|-------|---------------------------------|----------------|--------------------------|

DEFINITION Expression plasmid for expressing circular RNAs of a desired

sequence.

ACCESSION .

VERSION .

KEYWORDS pcDNA3.1(+) CircRNA Mini Vector

SOURCE synthetic DNA construct

ORGANISM synthetic DNA construct

REFERENCE 1 (bases 1 to 5607)

AUTHORS    Liang D, Wilusz JE

TITLE Short intronic repeat sequences facilitate circular RNA production.

JOURNAL Genes Dev. 2014 Oct 3. pii: gad.251926.114.

PUBMED 25281217

COMMENT This file is created by Vector NTI

<http://www.biofeng.com/>

COMMENT ORIGDB|GenBank

COMMENT VNTAUTHORNAME|biofeng.com|

COMMENT VNTNAME|pcDNA3.1(+) CircRNA Mini Vector|

FEATURES Location/Qualifiers

source 1..5607

/organism="synthetic DNA construct"

/mol\_type="other DNA"

primer\_bind complement(44..63)

/label=pRS-marker

/note="pRS vectors, use to sequence yeast selectable  
marker"

enhancer 235..614

/label=CMV enhancer

/note="human cytomegalovirus immediate early enhancer"

promoter 615..818

/label=CMV promoter

/note="human cytomegalovirus (CMV) immediate early  
promoter"

primer\_bind 769..789

/label=CMV-F

/note="Human CMV immediate early promoter, forward primer"

primer\_bind 863..882

/label=T7

/note="T7 promoter, forward primer"

promoter 863..881

/label=T7 promoter

/note="promoter for bacteriophage T7 RNA polymerase"

primer\_bind complement(1201..1218)

/label=BGH-rev

/note="Bovine growth hormone terminator, reverse primer."

Also called BGH reverse"

polyA\_signal 1207..1431

/label=bGH poly(A) signal

/note="bovine growth hormone polyadenylation signal"

rep\_origin 1477..1905

/direction=RIGHT

/label=f1 ori

/note="f1 bacteriophage origin of replication; arrow

indicates direction of (+) strand synthesis"

primer\_bind complement(1564..1583)

/label=Flori-R

/note="F1 origin, reverse primer"

primer\_bind 1774..1795

/label=Flori-F

/note="F1 origin, forward primer"

primer\_bind complement(1914..1934)

/label=pBABE 3'

/note="SV40 enhancer, reverse primer for pBABE vectors"

promoter 1919..2248

/label=SV40 promoter

/note="SV40 enhancer and early promoter"

rep\_origin 2099..2234

/label=SV40 ori

/note="SV40 origin of replication"

primer\_bind 2161..2180

/label=SV40pro-F

/note="SV40 promoter/origin, forward primer"

CDS 2315..3109

```
/codon_start=1

/gene="aph(3')-II (or nptII)"

/product="aminoglycoside phosphotransferase from Tn5"

/label=NeoR/KanR

/note="confers resistance to neomycin, kanamycin, and G418

(Geneticin(R))"

/translation="MIEQDGLHAGSPAAWVERLFGYDWAQQTIGCSDAAVFRLSAQGRP

VLFVKTDLSGALNELQDEAARLSWLATTGVPCA AVLDDVVTEAGRDWLLLG EVPGQDLLS

SHLAPAEKVSIMADAMRRLHTLDPATCPFDPHQAKHRIERARTRMEAGLVDQDDLDEEHQ

GLAPAELEFARLKARMPDGEDLVVTHGDACLPNIMVENGRFSGFIDCGRLGVADRYQDIA

LATRDIAEELGGEWADRFLVLYGIAAPDSQRIAFYRLLEFF"
```

```
primer_bind      complement(2369..2388)
```

```
/label=Neo-R
```

```
/note="Neomycin resistance gene, reverse primer"
```

```
primer_bind      2979..2998
```

```
/label=Neo-F
```

```
/note="Neomycin resistance gene, forward primer"
```

```
polyA_signal      3283..3404
```

```
/label=SV40 poly(A) signal
```

```
/note="SV40 polyadenylation signal"
```

```
primer_bind      complement(3320..3339)
```

```
/label=SV40pA-R
```

```
/note="SV40 polyA, reverse primer"
```

```
primer_bind      3374..3393
```

```
/label=EBV-rev
```

```
/note="SV40 polyA terminator, reverse primer"
```

```
primer_bind      complement(3453..3469)
```

```
/label=M13 rev
```

```
/note="common sequencing primer, one of multiple similar

variants"
```

```

primer_bind    complement(3453..3469)

                /label=M13 Reverse

                /note="In lacZ gene. Also called M13-rev"

primer_bind    complement(3466..3488)

                /label=M13/pUC Reverse

                /note="In lacZ gene"

protein_bind    3477..3493

                /label=lac operator

                /bound_moiety="lac repressor encoded by lacI"

                /note="The lac repressor binds to the lac operator to

inhibit transcription in E. coli. This inhibition can be

relieved by adding lactose or

isopropyl-beta-D-thiogalactopyranoside (IPTG)."
```

promoter complement(3501..3531)

/label=lac promoter

/note="promoter for the E. coli lac operon"

protein\_bind 3546..3567

/label=CAP binding site

/bound\_moiety="E. coli catabolite activator protein"

/note="CAP binding activates transcription in the presence

of cAMP."

primer\_bind complement(3684..3701)

/label=L4440

/note="L4440 vector, forward primer"

rep\_origin complement(3855..4440)

/direction=LEFT

/label=ori

/note="high-copy-number ColE1/pMB1/pBR322/pUC origin of

replication"

primer\_bind complement(3935..3954)

```

/label=pBR322ori-F

/note="pBR322 origin, forward primer"

CDS      complement(4611..5471)

/codon_start=1

/gene="bla"

/product="beta-lactamase"

/label=AmpR

/note="confers resistance to ampicillin, carbenicillin, and

related antibiotics"

/translation="MSIQHFRVALIPFFAAFCLPVFAHPETLVKVKDAEDQLGARVGYI

ELDLSNGKILESFRPEERFPMSTFKVLLCGAVLSRIDAGQEQLGRRIHYSQNDLVEYS

PVTEKHLTDGMTVRELCSAAITMSDNTAANLLLTIGGPKELTAFLHNMGDHVTRLDRW

EPELNEAIPNDERDITMPVAMATTLRKLLTGELLTLASRQQLIDWMEADKVAGPLLRSA

LPAGWFIADKSGAGERGSRGIIAALGPDGKPSRIVVIYTTGSQATMDERNRQIAEIGAS

LIKHW"

primer_bind      5234..5253

/label=Amp-R

/note="Ampicillin resistance gene, reverse primer"

promoter      complement(5472..5576)

/gene="bla"

/label=AmpR promoter

```

## ORIGIN

```

1  gacggatcgg gagatctccc gatccctat ggtgcactct cagtacaatc tgctctgatg

61  ccgcatagtt aagccagtat ctgctccctg cttgtgtgtt ggaggtcgct gagtagtgcg

121 cgagcaaaat ttaagctaca acaaggcaag gcttgaccga caattgcatg aagaatctgc

181 ttagggtagt gcgtttttgcg ctgcttcgcg atgtacgggc cagatatacg cgttgacatt

241 gattattgac tagttattaa tagtaataa ttacggggtc attagttcat agcccatata

301 tggagttccg cggtacataa cttacggtaa atggcccgcc tggctgaccg cccaacgacc

361 cccgccatt  gacgtcaata atgacgtatg ttcccatagt aacgccaata gggactttcc

421 attgacgtca atgggtggag tatttacggt aaactgcca cttggcagta catcaagtgt

```

481 atcatatgcc aagtacgcc cctattgacg tcaatgacgg taaatggccc gcctggcatt

541 atgcccagta catgacctta tgggactttc ctacttggca gtacatctac gtattagtca

601 tcgctattac catggtgatg cggttttggc agtacatcaa tgggcgtgga tagcggtttg

661 actcacgggg atttccaagt ctccacccca ttgacgtcaa tgggagtttg ttttggcacc

721 aaaaocaacg ggactttcca aaatgtcgta acaactccgc ccattgacg caaatgggcg

781 gtaggcgtgt acggtgggag gtctatataa gcagagctct ctggctaact agagaacca

841 ctgcttactg gcttatcgaa attaatacga ctactatag ggagacccaa gctggctagc

901 gtttaaaact aagcttggtta ccgagctcgg atccactagt ccagtgtggt ggaattcaaa

961 gtgctgagat tacaggcgtg agccaccacc cccggccac tttttgtaaa ggtacgtact

1021aatgactttt tttttatact tcaggatata atcgataccg gtttaattaa cactgggta

1081accgttaacc cgcggaggtta agaagcaagg aaaagaatta ggctcggcac ggtagctcac

1141acctgtaate ccagcagcgg ccgctcgagt ctagagggcc cgtttaaacc cgctgatcag

1201cctcgactgt gccttctagt tgccagccat ctgttgtttg cccctcccc gtgccttct

1261tgaccctgga aggtgccact ccactgtcc ttctctaata aaatgaggaa attgcacgc

1321attgtctgag taggtgtcat tctattctgg ggggtggggg ggggcaggac agcaaggggg

1381aggattggga agacaatagc aggcattgctg gggatgcggt gggctctatg gcttctgagg

1441cggaagaac cagctggggc tctagggggt atccccacgc gccctgtagc ggcgcattaa

1501gcgcggcggg tgtggtgggt acgcgcagcg tgaccgtac acttgccagc gccctagcgc

1561ccgctccttt cgctttcttc ccttccttcc tcgccacgtt cgccggcttt ccccgtaag

1621ctctaaatcg ggggtccct ttagggttcc gatttagtgc ttacgcgac ctgcacocca

1681aaaaacttga ttagggtgat ggttcacgta gtgggccatc gccctgatag acggtttttc

1741gccctttgac gttggagtcc acgttcttta atagtggact cttgttcaa actggaacaa

1801cactcaacc tatctcggtc tattcttttg attataagg gatthtgccg atttcggcct

1861attggttaaa aaatgagctg atttaacaaa aatttaacgc gaattaatc tgtggaatgt

1921gtgtcagtta ggggtggaa agtccccagg ctccccagca ggcagaagta tgcaaagcat

1981gcatctcaat tagtcagcaa coagggtgg aaagtccca ggctcccag caggcagaag

2041tatgcaaagc atgcatctca attagtacgc aaccatagtc ccgcccctaa ctccgcccat

2101ccgcccccta actccgccca gttccgccca ttctccgcc catggctgac taatthtttt

2161tatthtgca gaggccgagg ccgctctgc ctctgagcta ttccagaagt agtgaggagg

2221ctthttttgga ggcctaggct tttgcaaaaa gctccggga gcttgatat ccattthtcg



2281 atctgatcaa gagacaggat gaggatcggt tcgcatgatt gaacaagatg gattgcacgc

2341 aggtttctcg gccgcttggg tggagaggct attcggctat gactgggcac aacagacaat

2401 cggctgctct gatgccgcg tgttcggct gtcagcgcag gggcgcccg ttctttttgt

2461 caagaccgac ctgtccggtg cctggaatga actgcaggac gaggcagcgc ggctatcgtg

2521 gctggccacg acgggcggtt cttgcgcagc tgtgctgcac gttgtcactg aagcgggaag

2581 ggactggctg ctattgggcg aagtgccggg gcaggatctc ctgtcatctc accttgcctc

2641 tgccgagaaa gtatccatca tggctgatgc aatgcggcgg ctgcatacgc ttgatccggc

2701 taactgccca ttgaccacc aagcgaaaca tcgcatcgag cgagcacgta ctcggatgga

2761 agccggtctt gtcgatcagg atgatctgga cgaagagcat caggggctcg cgccagccga

2821 actgttcgcc aggcctcaag cgcgcgatgc cgacggcgag gatctcgtcg tgaccatgg

2881 cgatgcctgc ttgcogaata toatggtgga aaatggccgc tttctggat tcatcgactg

2941 tggccggctg ggtgtggcgg accgctatca ggacatagcg ttggctaccc gtgatattgc

3001 tgaagagctt ggcgcggaat gggctgaccg ctctcctgtg ctttacggta tcgccgctcc

3061 cgattcgcag cgcatcgct totatcgct tottgacgag ttctctgag cgggactctg

3121 gggttcgaaa tgaccgacca agcgacgcc aacctgcoat cagagattt cgattccacc

3181 gccgccttct atgaaagggt gggcttcgga atcgttttcc gggacgcgg ctggatgato

3241 ctccagcgcg gggatctcat gctggagttc ttgcgccacc ccaacttgtt tattgcagct

3301 tataatggtt acaataaag caatagcatc acaatttca caaataaagc attttttca

3361 ctgcattcta gttgtggtt gtccaaactc atcaatgtat cttatcatgt ctgtataccg

3421 tcgacctcta gctagagctt ggcgtaatca tggtcatagc tgtttcctgt tgaaaattgt

3481 tatccgctca caattccaca caacatacga gccggaagca taaagtgtaa agcctgggg

3541 gcctaagtag tgagctaact cacattaatt gcgttgcgct cactgcccgc tttccagtcg

3601 ggaaacctgt cgtgccagct goattaatga atcggccaac gcgcggggag aggcggtttg

3661 cgtattgggc gctcttcgc ttcctcgctc actgactcgc tgcgctcggt cgttcggctg

3721 cggcgagcgg tatcagctca ctcaaaggcg gtaatacggg tatccacaga atcaggggat

3781 aacgcaggaa agaacatgtg agcaaaaggc cagcaaaagg ccaggaaaccg taaaaaggcc

3841 gcgttgctgg cgtttttcca taggctccgc cccctgacg agcatcaca aaatcgacgc

3901 tcaagtcaga ggtggcgaaa ccgacagga ctataaagat accaggcgtt tccccctgga

3961 agtcctctcg tgcgctctcc tgttcgacc ctgccgtta ccggatacct gtccgcctt

4021 ctccctcgg gaagcgtggc gctttctcat agctcacgct gtaggtatct cagttcggtg

```

4081 taggtcgcttc gctccaagct gggctgtgtg cacgaacccc cgttcagcc cgaccgctgc

4141 gccttatccg gtaactatcg tottgagtc aaccggtaa gacacgactt atcgccaactg

4201 gcagcagcca ctggtaacag gattagcaga gcgaggtatg taggcggtgc tacagagttc

4261 ttgaagtggg ggcctaacta cggctacact agaagaacag tatttggtat ctgcgctctg

4321 ctgaagccag ttaccttcg aaaaagagtt ggtagctctt gatccggcaa acaaacacc

4381 gctggtagcg gttttttgt ttgcaagcag cagattacgc gcagaaaaaa aggatctcaa

4441 gaagatcctt tgatcttttc tacgggggtct gacgctcagt ggaacgaaaa ctcacgttaa

4501 gggatttttg tcatgagatt atcaaaaagg atcttcacct agatcctttt aaattaaaaa

4561 tgaagtttta aatcaatcta aagtatatat gagtaaaact ggtctgacag ttaccaatgc

4621 ttaatcagtg aggcacctat ctcagcgatc tgtctatttc gttcatccat agttgcctga

4681 ctcccgcgcg tgtagataac tacgatacgg gagggcttac catctggccc cagtgtctga

4741 atgataccgc gagaccacg ctcaccggct ccagatttat cagcaataaa ccagccagcc

4801 ggaagggcgc agcgcagaag tggctcctgca actttatccg cctccatcca gtctattaat

4861 tgttgccggg aagctagagt aagtagttcg ccagttaata gtttgcgcaa cgttgttgcc

4921 attgctacag gcacgtgtgt gtcacgctcg tcgttttgta tggttcatt cagctccggt

4981 tcccaacgat caagcgagtg tacatgatcc cccatgttgt gcaaaaaagc ggttagctcc

5041 ttcggtcctc cgatcgttgt cagaagtaag ttggccgcag tgttatcact catggttatg

5101 gcagcactgc ataattctct tactgtcatg ccatccgtaa gatgcttttc tgtgactggt

5161 gagtactcaa ccaagtcatt ctgagaatag tgtatgcggc gaccgagttg ctcttgcccc

5221 gcgtcaatac gggataatac cgcgccacat agcagaactt taaaagtgtc catcattgga

5281 aaacgttctt cggggcgaaa actotcaagg atottaccgc tgttgagatc cagttogatg

5341 taaccacctc gtgcacccaa ctgatcttca gcattcttta ctttcaccag cgtttctggg

5401 tgagcaaaaa caggaaggca aatgcccga aaaaagggaa taaggcgac acggaatgt

5461 tgaatactca tactcttctt tttcaatat tattgaagca tttatcaggg ttattgtctc

5521 atgagcggat acatatttga atgtatttag aaaaataaac aaataggggt tccgcgcaca

5581 tttcccgaa aagtgccacc tgacgtc

```

#### 4 siRNA information. **Custom Primers Information**

PIN A119404

Primer Name hsa\_circ\_0004214-siRNA-1-1907

Sequence(5' to 3'): See Figure 4.

PIN A119405

Primer Name hsa\_circ\_0004214-siRNA-1-1907

Sequence(5' to 3'): See Figure 4.

PIN A119406

Primer Name hsa\_circ\_0004214-siRNA-2-1493

Sequence(5' to 3'): See Figure 4.

PIN A119407

Primer Name hsa\_circ\_0004214-siRNA-2-1493

Sequence(5' to 3'): See Figure 4.

PIN A119710

Primer Name negative control.

Sequence(5' to 3'): See Figure 4.

PIN A119711

Primer Name negative control.

Sequence(5' to 3'): See Figure 4.

PIN A119712

Primer Name FAM negative control.

Sequence(5' to 3'): See Figure 4.

PIN A119713

Primer Name FAM negative control.

Sequence(5' to 3'): See Figure 4.

PIN A119714

Primer Name positive control (human GAPDH).

Sequence(5' to 3'): See Figure 4.

PIN A119715

Primer Name positive control (human GAPDH).

Sequence(5' to 3'): See Figure 4.

Order NO.RX051061      Date:2022-03-21  
Number of Primers:12      Number of Tubes:9

Order NO. RX051061

Date:2022-03-21

Number of Primers:12

Number of Tubes:9

| PIN     | Primer Name                       | Sequence (5'to 3')                                                                 | Length | Package    | MW(g/mol e) | Tm °C | GC%  | nmol/tube | µg/tube | Volume for 100µM per tube/µL | Purification | Modification | Deliverables/tube |
|---------|-----------------------------------|------------------------------------------------------------------------------------|--------|------------|-------------|-------|------|-----------|---------|------------------------------|--------------|--------------|-------------------|
| A119704 | hsa_circ_0004<br>214-siRNA-1-1907 | lrGlrGlrAlrAlrCllrUllrUllrGlrGlrCllrUllrGlrGlrAlrAlrGlrAlrAlrGlrAlrGlrAlrGlrAlrATT | 21     | 2.5 nmol*2 | 6828.25     | 54.4  | 52.4 | 2.5       | 17.1    | 25                           | HPLC         | RNA          | powder            |
| A119705 |                                   | lrUllrCllrUllrCllrUllrCllrUllrCllrCllrAlrGlrCllrAlrAlrAlrGlrUllrCllrCllrATT        | 21     |            | 6501.96     | 54.4  | 52.4 |           | 16.3    |                              | HPLC         | RNA          | powder            |
| A119706 | hsa_circ_0004<br>214-siRNA-2-1493 | lrUllrGlrGlrAlrAlrCllrAlrAlrAlrGlrGlrCllrCllrAlrUllrGlrAlrGlrAlrAlrAlrATT          | 21     | 2.5 nmol*2 | 6779.26     | 50.5  | 42.9 | 2.5       | 17      | 25                           | HPLC         | RNA          | powder            |
| A119707 |                                   | lrUllrUllrUllrCllrUllrCllrAlrUllrGlrGlrCllrCllrUllrUllrGlrUllrCllrCllrATT          | 21     |            | 6520.93     | 50.5  | 42.9 |           | 16.3    |                              | HPLC         | RNA          | powder            |
| A119708 | hsa_circ_0004<br>214-siRNA-3-2748 | lrCllrAlrAlrAlrAlrGlrGlrGlrAlrGlrCllrCllrGlrCllrAlrGlrAlrGlrAlrAlrATT              | 21     | 2.5 nmol*2 | 6801.31     | 52.4  | 47.6 | 2.5       | 17      | 25                           | HPLC         | RNA          | powder            |
| A119709 |                                   | lrUllrUllrUllrCllrUllrCllrUllrGlrCllrGlrGlrUllrCllrCllrCllrUllrUllrUllrGlrATT      | 21     |            | 6513.89     | 52.4  | 47.6 |           | 16.3    |                              | HPLC         | RNA          | powder            |

[illegible]

FIG 4

## **5. FISH Steps.**

### **Fish detection experimental materials and instruments:**

Reagents included 4% paraformaldehyde (Sigma, MKCL5723), 1% Triton x-100 (Biofroxx, 1139ML500), wet box, pre-hybridization solution (BOSTER, AR0152), oligonucleotide probe diluent (BOSTER, AR0062), DAPI staining solution (Beyotime C1005) and anti-fluorescence quenching mounting medium (Beyotime, P0126). The Fish probe sequence of hsa\_circ\_0004214 (5' to 3') is: GTTCTTGGCGTGCTGACTGG.

### **Experimental procedure:**

1. The cells were placed at the bottom of the 24-well plate, so that they would be around 60%–70% confluent at the time of harvesting.
2. The cells were fixed with 1 mL 4% paraformaldehyde for 30 min and washed three times with PBS.
3. 0.4% Triton X-100 (diluted in PBS) permeable at room temperature for 15 min; Soak and wash PBS for 3 times, 3 min each time.
4. Wash with 2×SSC three times for 5 min each time. And dry at room temperature for 2-3 min.
5. Incubate in the pre-hybridization solution at 42°C for 30 min.
6. Dilute the probe concentration to 500 nM and denature at 85°C for 5 min.
7. Adding it to the specimen area of the slide under a cover slip, putting it in a humid chamber and hybridizing overnight at 42°C.
8. Washing twice at room temperature with 2×SSC, 5 min each time; washing twice at room temperature with 1×SSC, 5 min each time; washing twice at room temperature with 0.5×SSC, 5 min each time; washing with 0.1×SSC at room temperature.
9. The samples were re-dyed with 5μl DAPI and cleaned with PBS 10 min later.
10. The slides were mounted with anti-fluorescence quenching mounting solution and observed under a confocal fluorescence microscope.
